# Supplementary material for: New Insights on the Terpenome of the Red Seaweed Laurencia dendroidea (Florideophyceae, Rhodophyta)
Source: PubMed Central journal article supplement (PMC4344607; doi:10.3390/md13020879), 2015-02-10
Supplement: marinedrugs-13-00879-s001.pdf [file marinedrugs-13-00879-s001.pdf]

## Supplementary Information

The domain composition of sequences from *Laurencia dendroidea* that were annotated as terpene synthases and presented in Table 2 of the main manuscript were obtained through search for conserved domains using the NCBI Conserved Domain Database (CDD, [1]) and compared with the domain composition of corresponding sequences available in the SwissProt/UniProt and PlantCycDB databases. Analyzing the tables and figures below, we reinforce the Blast annotations presented in Table 2 of the main manuscript text, although biochemical and gene cloning approaches are necessary to prove these *in silico* identifications. For two of the 21 terpene synthase sequences from *Laurencia* (identified as nerolidol synthase and (+)-delta-cadinene synthase), we were not able to identify conserved domains, possibly because they were partial sequences. In the case of alpha-bisabolene synthase, we provide the domain composition of a reference sequence and the alignment of the sequence from *L. dendroidea* with this reference, showing a high similarity between them.

**Table S1.** List of domain hits for a putative (3R)-linalool synthase gene from *L. dendroidea*.

| Name | Accession | Description                                                                                  | Interval | E-Value  |
|------|-----------|----------------------------------------------------------------------------------------------|----------|----------|
| rad1 | TIGR00596 | DNA repair protein (rad1); All proteins in this family for which functions are known are ... | 1–51     | 1.04e-15 |

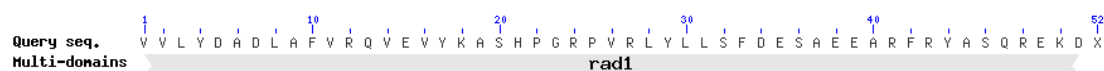

**Figure S1.** Conserved domains detected in a putative (3R)-linalool synthase gene from *L. dendroidea* (edited from the NCBI CDD database, [1]).

**Table S2.** List of domain hits for the (3R)-linalool synthase gene from *Zea mays mays* (GDQC-116173-MONOMER—PlantCycDB).

| Name                     | Accession | Description                                                                                      | Interval  | E-Value   |
|--------------------------|-----------|--------------------------------------------------------------------------------------------------|-----------|-----------|
| Terpene_cyclase_plant_C1 | cd00684   | Plant Terpene Cyclases, Class 1; This CD includes a diverse group of monomeric plant terpene ... | 1377–1833 | 9.57e-107 |
| ERCC4                    | pfam02732 | ERCC4 domain; This domain is a family of nucleases. The family includes EME1 which is an ...     | 732–859   | 2.10e-28  |
| rad1                     | TIGR00596 | DNA repair protein (rad1); All proteins in this family for which functions are known are ...     | 88–933    | 0e+00     |

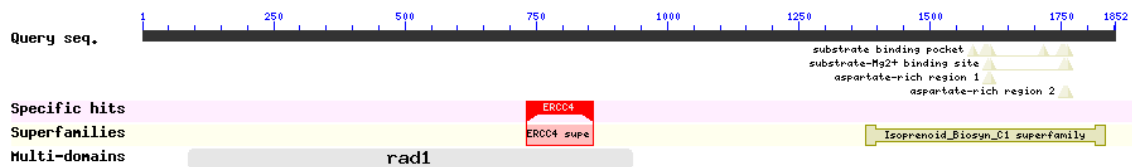

**Figure S2.** Conserved domains detected in the (3R)-linalool synthase gene from *Zea mays mays* (GDQC-116173-MONOMER—PlantCycDB) (edited from the NCBI CDD database, [1]).

**Table S3.** List of domain hits for a putative (+)-trans-carveol dehydrogenase gene from *L. dendroidea*.

| Name           | Accession  | Description                                                                                        | Interval | E-value  |
|----------------|------------|----------------------------------------------------------------------------------------------------|----------|----------|
| CR_SDR_c       | cd08936    | Porcine peroxisomal carbonyl reductase like, classical (c) SDR; This subgroup contains porcine ... | 17–272   | 1.05e-91 |
| PRK05875       | PRK05875   | short chain dehydrogenase; Provisional                                                             | 11–267   | 2.12e-39 |
| adh_short_C2   | pfam13561  | Enoyl-(Acyl carrier protein) reductase;                                                            | 22–268   | 1.19e-35 |
| PLN02730       | PLN02730   | enoyl-[acyl-carrier-protein] reductase                                                             | 85–262   | 3.56e-14 |
| sepiapter_red  | TIGR01500  | sepiapterin reductase; This model describes sepiapterin reductase, a member of the short chain ... | 17–201   | 5.40e-06 |
| PKS_KR         | smart00822 | This enzymatic domain is part of bacterial polyketide synthases; It catalyses the first step ...   | 19–167   | 2.88e-04 |
| fabG           | PRK07231   | 3-ketoacyl-(acyl-carrier-protein) reductase; Provisional                                           | 17–267   | 2.43e-77 |
| FabG           | COG1028    | Dehydrogenases with different specificities (related to short-chain alcohol dehydrogenases) ...    | 14–267   | 4.59e-61 |
| 3oxo_ACP_reduc | TIGR01830  | 3-oxoacyl-(acyl-carrier-protein) reductase; This model represents 3-oxoacyl-[ACP] reductase, ...   | 18–267   | 3.80e-55 |
| adh_short      | pfam00106  | short chain dehydrogenase; This family contains a wide variety of dehydrogenases.                  | 17–185   | 4.24e-25 |
| PLN02253       | PLN02253   | xanthoxin dehydrogenase                                                                            | 10–267   | 3.65e-18 |
| Se_ygfk        | TIGR03315  | putative selenate reductase, Ygfk subunit; Members of this protein family are Ygfk, predicted ...  | 6–63     | 5.85e-03 |

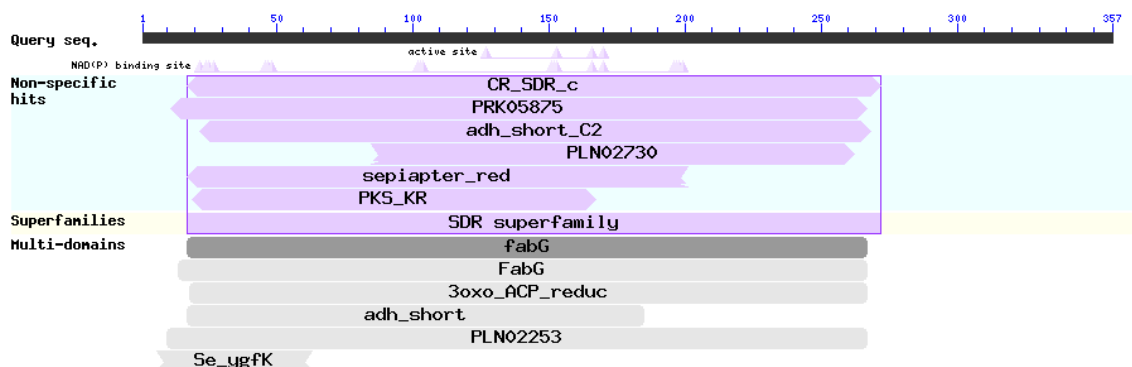

**Figure S3.** Conserved domains detected in a putative (+)-trans-carveol dehydrogenase gene from *L. dendroidea* (edited from the NCBI CDD database, [1]).

**Table S4.** List of domain hits for the (+)-trans-carveol dehydrogenase gene from *Mentha piperita* (sp|Q5C9I9|ISPD\_MENPI).

| Name                               | Accession  | Description                                                                                      | Interval | E-Value  |
|------------------------------------|------------|--------------------------------------------------------------------------------------------------|----------|----------|
| secoisolariciresinol-DH_like_SDR_c | cd05326    | secoisolariciresinol dehydrogenase (secoisolariciresinol-DH)-like, classical (c) SDRs;           | 6–255    | 4.43e-70 |
| PRK06947                           | PRK06947   | glucose-1-dehydrogenase; Provisional                                                             | 10–254   | 1.34e-28 |
| adh_short_C2                       | pfam13561  | Enoyl-(Acyl carrier protein) reductase;                                                          | 16–255   | 1.75e-19 |
| PLN00015                           | PLN00015   | protochlorophyllide reductase                                                                    | 13–102   | 3.87e-10 |
| PKS_KR                             | smart00822 | This enzymatic domain is part of bacterial polyketide synthases; It catalyses the first step ... | 10–124   | 5.58e-09 |
| LPOR                               | TIGR01289  | light-dependent protochlorophyllide reductase; This model represents the light-dependent,        | 12–101   | 3.14e-06 |
| PLN02253                           | PLN02253   | xanthoxin dehydrogenase                                                                          | 3–257    | 2.86e-63 |
| PRK08324                           | PRK08324   | short chain dehydrogenase; Validated                                                             | 1–255    | 4.79e-61 |
| FabG                               | COG1028    | Dehydrogenases with different specificities (related to short-chain alcohol dehydrogenases) ...  | 6–255    | 1.64e-50 |
| RhaD_aldol-ADH                     | TIGR02632  | rhamnulose-1-phosphate aldolase/alcohol dehydrogenase;                                           | 1–255    | 3.70e-45 |
| adh_short                          | pfam00106  | short chain dehydrogenase; This family contains a wide variety of dehydrogenases.                | 10–178   | 4.18e-20 |

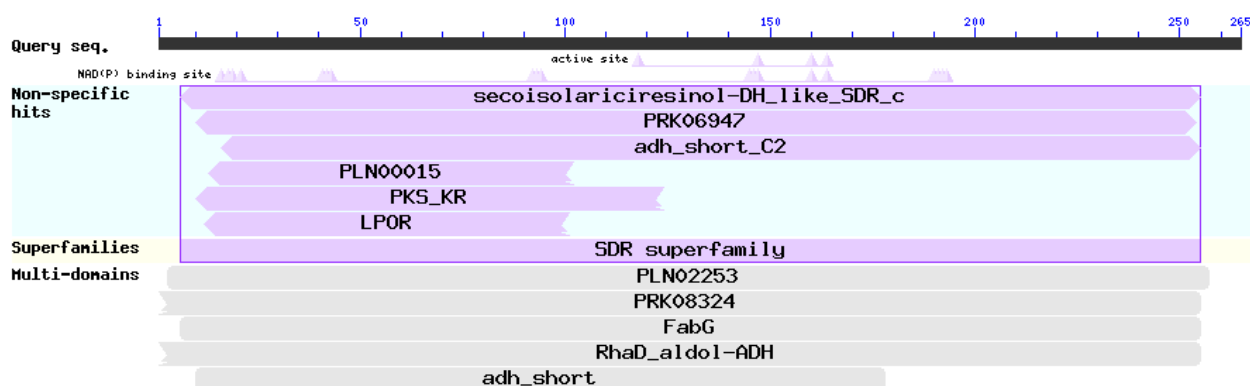**Figure S4.** Conserved domains detected in the (+)-trans-carveol dehydrogenase gene from *Mentha piperita* (sp|Q5C9I9|ISPD\_MENPI) (edited from the NCBI CDD database, [1]).

**Table S5.** List of domain hits for a putative (+)-pulegone reductase gene from *L. dendroidea*.

| Name                         | Accession | Description                                                                                        | Interval | E-Value   |
|------------------------------|-----------|----------------------------------------------------------------------------------------------------|----------|-----------|
| PGDH                         | cd05288   | Prostaglandin dehydrogenases; Prostaglandins and related eicosanoids are metabolized by the ...    | 1–293    | 9.21e-128 |
| leukotriene_B4_DH_like       | cd08294   | 13-PGR is a bifunctional enzyme with delta-13 15-prostaglandin reductase and leukotriene B4 12 ... | 14–294   | 1.49e-74  |
| double_bond_reductase_like   | cd08295   | Arabidopsis alkenal double bond reductase and leukotriene B4 12-hydroxydehydrogenase; This ...     | 1–295    | 7.02e-73  |
| PTGR2                        | cd08293   | Prostaglandin reductase; Prostaglandins and related eicosanoids are metabolized by the ...         | 1–294    | 3.04e-65  |
| Mgc45594_like                | cd08250   | Mgc45594 gene product and other MDR family members; Includes Human Mgc45594 gene product of ...    | 28–294   | 1.18e-48  |
| QOR1                         | cd08241   | Quinone oxidoreductase (QOR); QOR catalyzes the conversion of a quinone + NAD(P)H to a ...         | 29–294   | 1.89e-39  |
| p53_inducible_oxidoreductase | cd05276   | PIG3 p53-inducible quinone oxidoreductase; a medium ...                                            | 53–293   | 9.65e-29  |
| zeta_crystallin              | cd08253   | Zeta-crystallin with NADP-dependent quinone reductase activity (QOR); Zeta-crystallin is a eye ... | 65–295   | 6.42e-27  |
| MDR_like_2                   | cd05289   | alcohol dehydrogenase and quinone reductase-like medium chain dehydrogenases/reductases; ...       | 45–293   | 5.28e-26  |
| Zn_ADH_like1                 | cd08266   | Alcohol dehydrogenases of the MDR family; This group contains proteins related to the ...          | 85–295   | 9.64e-24  |

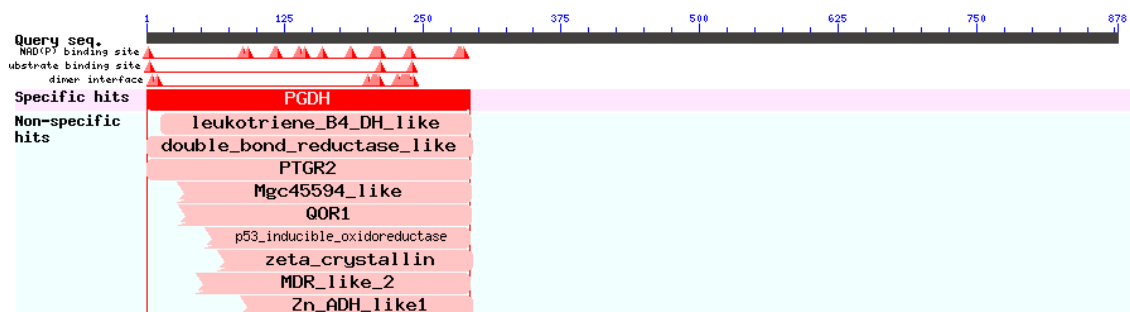**Figure S5.** Conserved domains detected in a putative (+)-pulegone reductase gene from *L. dendroidea* (edited from the NCBI CDD database [1]).

**Table S6.** List of domain hits for the (+)-pulegone reductase gene from *Mentha piperita* (sp|Q6WAU0|PULR\_MENPI).

| Name                         | Accession | Description                                                                                        | Interval | E-Value   |
|------------------------------|-----------|----------------------------------------------------------------------------------------------------|----------|-----------|
| double_bond_reductase_like   | cd08295   | Arabidopsis alkenal double bond reductase and leukotriene B4 12-hydroxydehydrogenase; This ...     | 2–339    | 0e+00     |
| PGDH                         | cd05288   | Prostaglandin dehydrogenases; Prostaglandins and related eicosanoids are metabolized by the ...    | 3–337    | 1.06e-144 |
| leukotriene_B4_DH_like       | cd08294   | 13-PGR is a bifunctional enzyme with delta-13 15-prostaglandin reductase and leukotriene B4 12 ... | 2–339    | 1.23e-104 |
| PTGR2                        | cd08293   | Prostaglandin reductase; Prostaglandins and related eicosanoids are metabolized by the ...         | 3–339    | 3.91e-65  |
| Mgc45594_like                | cd08250   | Mgc45594 gene product and other MDR family members; Includes Human Mgc45594 gene product of ...    | 137–337  | 7.60e-47  |
| zeta_crystallin              | cd08253   | Zeta-crystallin with NADP-dependent quinone reductase activity (QOR); Zeta-crystallin is a eye ... | 29–283   | 3.04e-28  |
| MDR                          | cd05188   | Medium chain reductase/dehydrogenase (MDR)/zinc-dependent alcohol dehydrogenase-like family; ...   | 94–297   | 9.69e-27  |
| p53_inducible_oxidoreductase | cd05276   | PIG3 p53-inducible quinone oxidoreductase; PIG3 p53-inducible quinone oxidoreductase, a medium ... | 138–307  | 1.44e-25  |
| MDR_like_2                   | cd05289   | alcohol dehydrogenase and quinone reductase-like medium chain dehydrogenases/reductases; ...       | 31–323   | 3.42e-25  |
| ADH_zinc_N                   | pfam00107 | Zinc-binding dehydrogenase;                                                                        | 16–298   | 3.91e-21  |

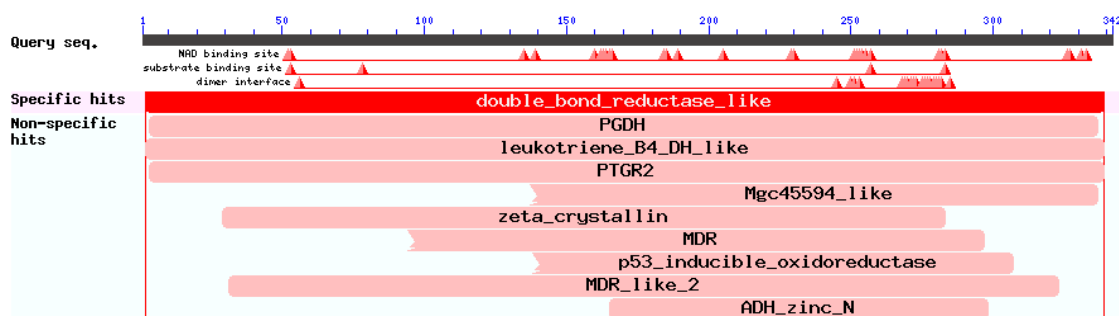**Figure S6.** Conserved domains detected in the (+)-pulegone reductase gene from *Mentha piperita* (sp|Q6WAU0|PULR\_MENPI) (edited from the NCBI CDD database, [1]).

**Table S7.** List of domain hits for a putative (-)-isopiperitenone reductase gene from *L. dendroidea*.

| Name                   | Accession | Description                                                                                             | Interval | E-Value  |
|------------------------|-----------|---------------------------------------------------------------------------------------------------------|----------|----------|
| 17beta-HSD1_like_SDR_c | cd05356   | 17-beta-hydroxysteroid dehydrogenases (17beta-HSDs) types -1, -3, and -12, -like, classical (c) ...     | 34–146   | 3.56e-31 |
| PRK08339               | PRK08339  | short chain dehydrogenase; Provisional                                                                  | 27–112   | 1.20e-09 |
| sepiapter_red          | TIGR01500 | sepiapterin reductase; This model describes sepiapterin reductase, a member of the short chain ...      | 37–119   | 3.85e-06 |
| DltE                   | COG0300   | Short-chain dehydrogenases of various substrate specificities [General function prediction ...          | 32–146   | 7.97e-29 |
| PLN02780               | PLN02780  | ketoreductase/oxidoreductase                                                                            | 14–146   | 7.50e-23 |
| fabG                   | PRK07666  | 3-ketoacyl-(acyl-carrier-protein) reductase; Provisional                                                | 37–145   | 3.61e-17 |
| 23BDH                  | TIGR02415 | acetoin reductases; One member of this family, as characterized in <i>Klebsiella terrigena</i> , is ... | 37–145   | 3.62e-12 |
| adh_short              | pfam00106 | short chain dehydrogenase; This family contains a wide variety of dehydrogenases.                       | 36–145   | 1.50e-09 |

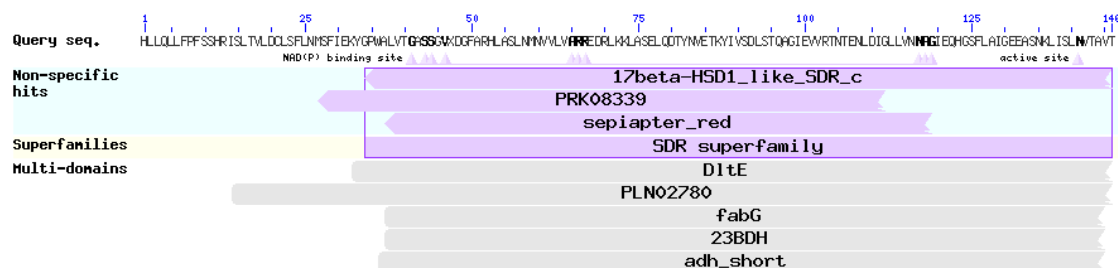**Figure S7.** Conserved domains detected in a putative (-)-isopiperitenone reductase gene from *L. dendroidea* (edited from the NCBI CDD database, [1]).**Table S8.** List of domain hits for the (-)-isopiperitenone reductase gene from *Mentha piperita* (sp|Q6WAU1|IPIPR\_MENPI).

| Name                     | Accession  | Description                                                                                        | Interval | E-Value  |
|--------------------------|------------|----------------------------------------------------------------------------------------------------|----------|----------|
| carb_red_PTCR-like_SDR_c | cd05324    | Porcine testicular carbonyl reductase (PTCR)-like, classical (c) SDRs; PTCR is a classical SDR ... | 6–311    | 1.99e-74 |
| PRK05854                 | PRK05854   | short chain dehydrogenase; Provisional                                                             | 6–96     | 4.90e-15 |
| adh_short_C2             | pfam13561  | Enoyl-(Acyl carrier protein) reductase;                                                            | 15–126   | 4.28e-11 |
| PKS_KR                   | smart00822 | This enzymatic domain is part of bacterial polyketide synthases; It catalyses the first step ...   | 9–96     | 8.02e-11 |
| sepiapter_red            | TIGR01500  | sepiapterin reductase; This model describes sepiapterin reductase, a member of the short chain ... | 7–120    | 1.78e-06 |

Table S8. Cont.

|           |           |                                                                                               |       |          |
|-----------|-----------|-----------------------------------------------------------------------------------------------|-------|----------|
| PLN00015  | PLN00015  | protochlorophyllide reductase                                                                 | 9–96  | 1.60e-03 |
| PRK12939  | PRK12939  | short chain dehydrogenase; Provisional                                                        | 6–299 | 2.99e-15 |
| FabG      | COG1028   | Dehydrogenases with different specificities (related to short-chain alcohol dehydrogenases) . | 8–300 | 4.86e-27 |
| adh_short | pfam00106 | short chain dehydrogenase; This family contains a wide variety of dehydrogenases.             | 8–138 | 3.61e-19 |

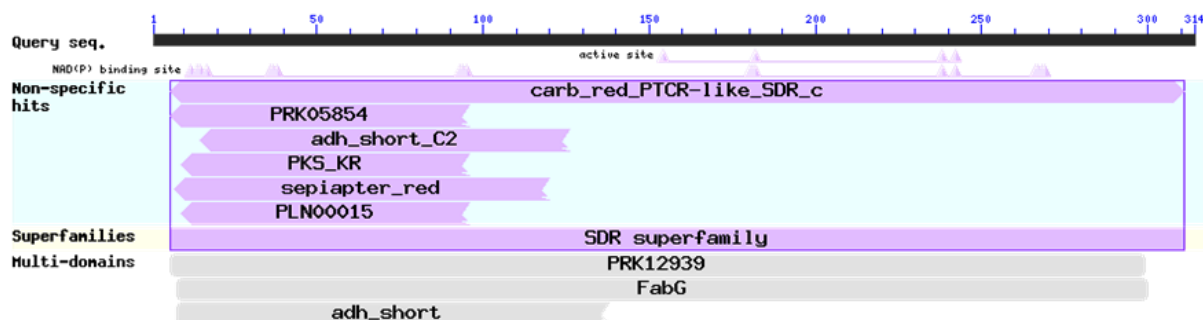

**Figure S8.** Conserved domains detected in the (-)-isopiperitenone reductase gene from *Mentha piperita* (sp|Q6WAU1|IPIPR\_MENPI) (edited from the NCBI CDD database, [1]).

**Table S9.** List of domain hits for a putative secologanin synthase gene from *L. dendroidea*.

| Name     | Accession | Description                                                                            | Interval | E-Value  |
|----------|-----------|----------------------------------------------------------------------------------------|----------|----------|
| p450     | pfam00067 | Cytochrome P450; Cytochrome P450s are haem-thiolate proteins involved in the oxidative | 160–384  | 2.32e-29 |
| CypX     | COG2124   | Cytochrome P450 [Secondary metabolites biosynthesis, transport, and catabolism]        | 13–378   | 2.81e-25 |
| PLN02290 | PLN02290  | cytokinin trans-hydroxylase                                                            | 170–351  | 8.00e-17 |
| PLN02169 | PLN02169  | fatty acid (omega-1)-hydroxylase/midchain alkane hydroxylase                           | 168–356  | 8.21e-17 |
| PLN03195 | PLN03195  | fatty acid omega-hydroxylase; Provisional                                              | 167–378  | 9.71e-15 |
| PLN02426 | PLN02426  | cytochrome P450, family 94, subfamily C protein                                        | 168–370  | 6.50e-14 |
| PLN00168 | PLN00168  | Cytochrome P450; Provisional                                                           | 160–356  | 7.30e-14 |
| PLN02936 | PLN02936  | epsilon-ring hydroxylase                                                               | 162–380  | 1.74e-13 |
| PLN02687 | PLN02687  | flavonoid 3'-monooxygenase                                                             | 159–344  | 6.33e-09 |
| PLN02655 | PLN02655  | ent-kaurene oxidase                                                                    | 160–378  | 1.04e-07 |
| PLN00110 | PLN00110  | flavonoid 3',5'-hydroxylase (F3'5'H); Provisional                                      | 154–300  | 6.62e-07 |
| PTZ00404 | PTZ00404  | cytochrome P450; Provisional                                                           | 164–359  | 7.19e-07 |
| PLN02183 | PLN02183  | ferulate 5-hydroxylase                                                                 | 160–298  | 1.08e-06 |
| PLN03018 | PLN03018  | homomethionine N-hydroxylase                                                           | 155–349  | 1.21e-06 |
| PLN03112 | PLN03112  | cytochrome P450 family protein; Provisional                                            | 172–300  | 3.83e-06 |
| PLN02971 | PLN02971  | tryptophan N-hydroxylase                                                               | 157–357  | 5.06e-06 |
| PLN02966 | PLN02966  | cytochrome P450 83A1                                                                   | 157–338  | 5.44e-06 |
| PLN03234 | PLN03234  | cytochrome P450 83B1; Provisional                                                      | 144–345  | 1.74e-05 |
| PLN02394 | PLN02394  | trans-cinnamate 4-monooxygenase                                                        | 178–380  | 2.89e-04 |
| PLN02302 | PLN02302  | ent-kaurenoic acid oxidase                                                             | 152–359  | 4.88e-04 |
| PLN02774 | PLN02774  | brassinosteroid-6-oxidase                                                              | 159–361  | 6.03e-03 |

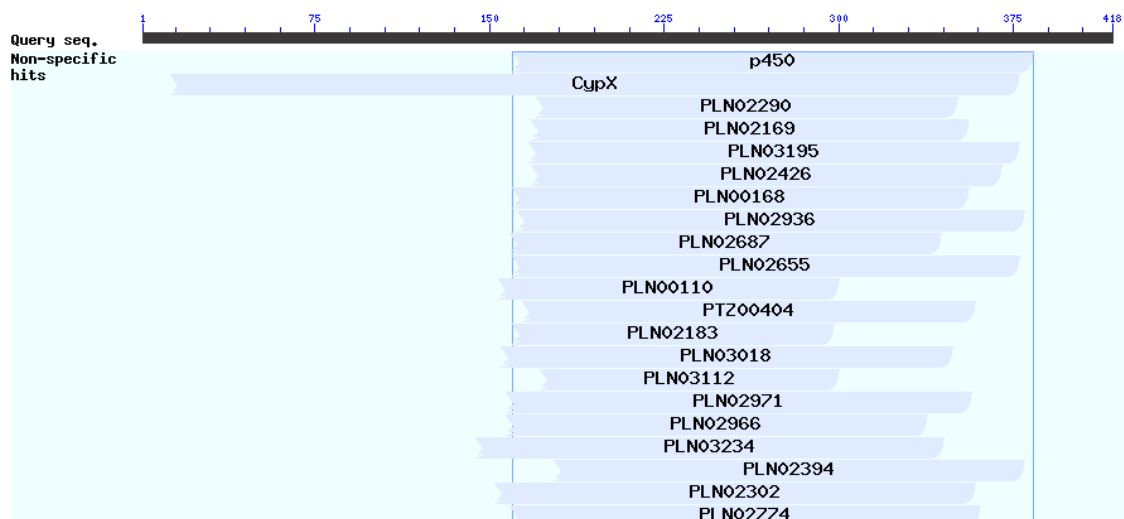

**Figure S9.** Conserved domains detected in a putative secologanin synthase gene from *L. dendroidea* (edited from the NCBI CDD database, [1]).

**Table S10.** List of domain hits for the secologanin synthase gene from *Catharanthus roseus* (sp|Q05047|C72A1\_CATRO).

| Name     | Accession | Description                                                                                | Interval | E-Value   |
|----------|-----------|--------------------------------------------------------------------------------------------|----------|-----------|
| PLN02290 | PLN02290  | cytokinin trans-hydroxylase                                                                | 5–524    | 2.05e-129 |
| p450     | pfam00067 | Cytochrome P450; Cytochrome P450s are haem-thiolate proteins involved in the oxidative ... | 102–497  | 4.56e-82  |
| CypX     | COG2124   | Cytochrome P450 [Secondary metabolites biosynthesis, transport, and catabolism]            | 114–521  | 3.87e-50  |
| PLN02936 | PLN02936  | epsilon-ring hydroxylase                                                                   | 100–497  | 3.71e-41  |
| PLN02687 | PLN02687  | flavonoid 3'-monooxygenase                                                                 | 190–496  | 2.09e-26  |
| PLN02426 | PLN02426  | cytochrome P450, family 94, subfamily C protein                                            | 260–503  | 2.27e-26  |
| PTZ00404 | PTZ00404  | cytochrome P450; Provisional                                                               | 64–493   | 7.42e-24  |
| PLN03195 | PLN03195  | fatty acid omega-hydroxylase; Provisional                                                  | 110–497  | 8.36e-24  |
| PLN02302 | PLN02302  | ent-kaurenoic acid oxidase                                                                 | 88–507   | 3.89e-23  |
| PLN02183 | PLN02183  | ferulate 5-hydroxylase                                                                     | 208–495  | 8.15e-23  |
| PLN03112 | PLN03112  | cytochrome P450 family protein; Provisional                                                | 93–497   | 1.07e-21  |
| PLN02169 | PLN02169  | fatty acid (omega-1)-hydroxylase/midchain alkane hydroxylase                               | 260–521  | 1.98e-21  |
| PLN02655 | PLN02655  | ent-kaurene oxidase                                                                        | 228–491  | 2.30e-21  |
| PLN02966 | PLN02966  | cytochrome P450 83A1                                                                       | 183–495  | 8.06e-19  |
| PLN03234 | PLN03234  | cytochrome P450 83B1; Provisional                                                          | 164–495  | 2.81e-18  |
| PLN00168 | PLN00168  | Cytochrome P450; Provisional                                                               | 314–497  | 3.95e-16  |
| PLN02987 | PLN02987  | Cytochrome P450, family 90, subfamily A                                                    | 223–493  | 2.87e-15  |
| PLN02971 | PLN02971  | tryptophan <i>N</i> -hydroxylase                                                           | 242–498  | 3.03e-15  |
| PLN02394 | PLN02394  | trans-cinnamate 4-monooxygenase                                                            | 332–491  | 1.33e-14  |
| PLN00110 | PLN00110  | flavonoid 3',5'-hydroxylase (F3'5'H); Provisional                                          | 247–491  | 6.65e-12  |
| PLN02500 | PLN02500  | cytochrome P450 90B1                                                                       | 272–496  | 1.01e-11  |
| PLN03018 | PLN03018  | homomethionine <i>N</i> -hydroxylase                                                       | 150–522  | 3.32e-11  |
| PLN02774 | PLN02774  | brassinosteroid-6-oxidase                                                                  | 107–494  | 4.36e-11  |



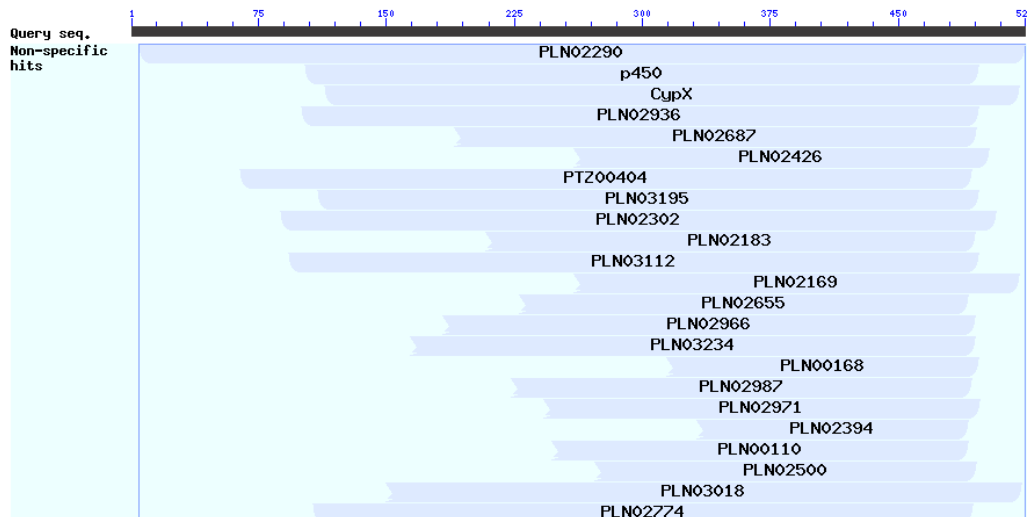

**Figure S10.** Conserved domains detected in the secologanin synthase gene from *Catharanthus roseus* (sp|Q05047|C72A1\_CATRO) (edited from the NCBI CDD database, [1]).

**Table S11.** List of domain hits for a putative farnesyl-diphosphate farnesyltransferase gene from *L. dendroidea*.

| Name                 | Accession | Description                                                                                        | Interval | E-Value   |
|----------------------|-----------|----------------------------------------------------------------------------------------------------|----------|-----------|
| squal_synth          | TIGR01559 | farnesyl-diphosphate farnesyltransferase; This model describes farnesyl-diphosphate ...            | 139–411  | 1.00e-104 |
| Trans_IPPS_HH        | cd00683   | Trans-Isoprenyl Diphosphate Synthases, head-to-head; These trans-Isoprenyl Diphosphate ...         | 165–364  | 2.49e-47  |
| SQS_PSY              | pfam00494 | Squalene/phytoene synthase;                                                                        | 158–361  | 1.01e-37  |
| ERG9                 | COG1562   | Phytoene/squalene synthetase [Lipid metabolism]                                                    | 180–370  | 2.86e-35  |
| Trans_IPPS           | cd00867   | Trans-Isoprenyl Diphosphate Synthases; Trans-Isoprenyl Diphosphate Synthases (Trans_IPPS) of ...   | 179–286  | 1.13e-17  |
| Isoprenoid_Biosyn_C1 | cd00385   | Isoprenoid Biosynthesis enzymes, Class 1; Superfamily of trans-isoprenyl diphosphate synthases ... | 174–325  | 4.43e-17  |
| HpnD                 | TIGR03465 | squalene synthase HpnD; The genes of this family are often found in the same genetic locus ...     | 193–275  | 1.41e-08  |
| PLN02632             | PLN02632  | phytoene synthase                                                                                  | 185–275  | 4.93e-07  |

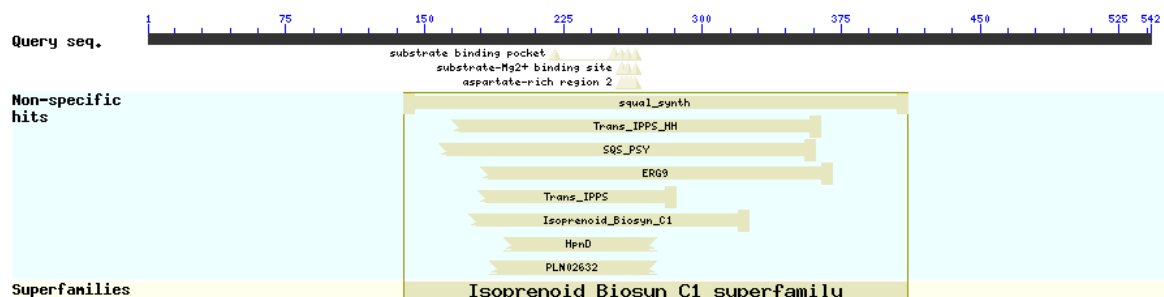

**Figure S11.** Conserved domains detected in a putative farnesyl-diphosphate farnesyltransferase gene from *L. dendroidea* (edited from the NCBI CDD database, [1]).

**Table S12.** List of domain hits for the farnesyl-diphosphate farnesyltransferase gene from *Scheffersomyces stipitis* (tr|A3LTQ5|A3LTQ5\_PICST).

| Name          | Accession | Description                                                                                | Interval | E-value  |
|---------------|-----------|--------------------------------------------------------------------------------------------|----------|----------|
| Trans_IPPS_HH | cd00683   | Trans-Isoprenyl Diphosphate Synthases, head-to-head; These trans-Isoprenyl Diphosphate ... | 40–333   | 2.34e-74 |
| squal_synth   | TIGR01559 | farnesyl-diphosphate farnesyltransferase; This model describes farnesyl-diphosphate ...    | 39–381   | 0e+00    |
| ERG9          | COG1562   | Phytoene/squalene synthetase [Lipid metabolism]                                            | 39–342   | 1.08e-57 |
| SQS_PSY       | pfam00494 | Squalene/phytoene synthase;                                                                | 48–329   | 5.08e-48 |
| PLN02632      | PLN02632  | phytoene synthase                                                                          | 170–242  | 9.10e-07 |

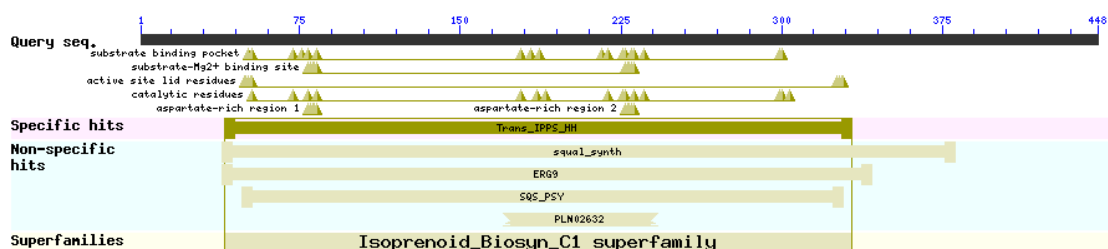**Figure S12.** Conserved domains detected in the farnesyl-diphosphate farnesyltransferase gene from *Scheffersomyces stipitis* (tr|A3LTQ5|A3LTQ5\_PICST) (edited from the NCBI CDD database, [1]).**Table S13.** List of domain hits for a putative squalene monooxygenase gene from *L. dendroidea*.

| Name     | Accession | Description                                                                                        | Interval | E-Value   |
|----------|-----------|----------------------------------------------------------------------------------------------------|----------|-----------|
| SE       | pfam08491 | Squalene epoxidase; This domain is found in squalene epoxidase (SE) and related proteins which ... | 11–258   | 2.16e-101 |
| PRK07608 | PRK07608  | ubiquinone biosynthesis hydroxylase family protein; Provisional                                    | 100–200  | 3.03e-04  |
| COQ6     | TIGR01989 | ubiquinone biosynthesis monooxygenase COQ6; This model represents the monooxygenase ...            | 110–198  | 7.59e-03  |
| PTZ00367 | PTZ00367  | squalene epoxidase; Provisional                                                                    | 15–275   | 2.05e-68  |
| PLN02985 | PLN02985  | squalene monooxygenase                                                                             | 30–275   | 6.46e-56  |
| UbiH     | COG0654   | 2-polyprenyl-6-methoxyphenol hydroxylase and related FAD-dependent oxidoreductases [Coenzyme ...   | 16–205   | 7.72e-12  |
| PRK07045 | PRK07045  | putative monooxygenase; Reviewed                                                                   | 114–185  | 1.84e-04  |

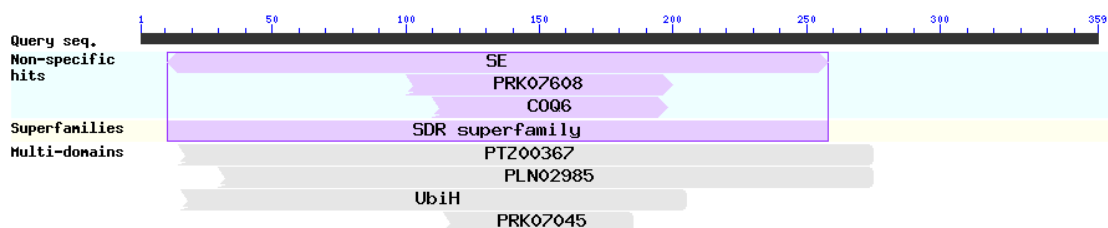**Figure S13.** Conserved domains detected in a putative squalene monooxygenase gene from *L. dendroidea* (edited from the NCBI CDD database, [1]).

**Table S14.** List of domain hits for the squalene monooxygenase gene from *Arabidopsis thaliana* (sp|O65403|ERG13\_ARATH).

| Name          | Accession | Description                                                                                        | Interval | E-value   |
|---------------|-----------|----------------------------------------------------------------------------------------------------|----------|-----------|
| SE            | pfam08491 | Squalene epoxidase; This domain is found in squalene epoxidase (SE) and related proteins which ... | 195–472  | 2.27e-124 |
| PRK08773      | PRK08773  | 2-octaprenyl-3-methyl-6-methoxy-1,4-benzoquinol hydroxylase; Validated                             | 40–364   | 3.79e-09  |
| NAD_binding_8 | pfam13450 | NAD(P)-binding Rossmann-like domain;                                                               | 48–74    | 5.95e-07  |
| PRK12834      | PRK12834  | putative FAD-binding dehydrogenase; Reviewed                                                       | 44–105   | 1.76e-06  |
| THI4          | COG1635   | Ribulose 1,5-bisphosphate synthetase, converts PRPP to RuBP, flavoprotein [Carbohydrate ...        | 44–76    | 2.60e-05  |
| PLN02661      | PLN02661  | Putative thiazole synthesis                                                                        | 44–74    | 3.21e-03  |
| PTZ00383      | PTZ00383  | malate:quinone oxidoreductase; Provisional                                                         | 25–74    | 5.01e-03  |
| PLN02985      | PLN02985  | squalene monooxygenase                                                                             | 1–515    | 0e+00     |
| PTZ00367      | PTZ00367  | squalene epoxidase; Provisional                                                                    | 6–499    | 3.11e-86  |
| UbiH          | COG0654   | 2-polyprenyl-6-methoxyphenol hydroxylase and related FAD-dependent oxidoreductases [Coenzyme ...   | 44–439   | 6.61e-36  |

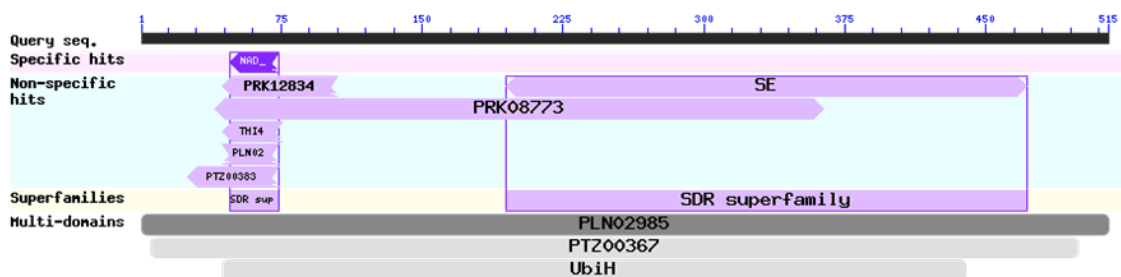**Figure S14.** Conserved domains detected in the squalene monooxygenase gene from *Arabidopsis thaliana* (sp|O65403|ERG13\_ARATH) (edited from the NCBI CDD database, [1]).**Table S15.** List of domain hits for a putative squalene-hopene/tetraprenyl-beta-curcumene cyclase gene from *L. dendroidea*.

| Name            | Accession | Description                                                                                     | Interval | E-value   |
|-----------------|-----------|-------------------------------------------------------------------------------------------------|----------|-----------|
| SQCY_1          | cd02892   | Squalene cyclase (SQCY) domain subgroup 1; found in class II terpene cyclases that have an ...  | 1–363    | 5.98e-143 |
| SQCY            | cd02889   | Squalene cyclase (SQCY) domain; found in class II terpene cyclases that have an alpha 6— ...    | 24–363   | 8.74e-126 |
| ISOPREN_C2_like | cd00688   | This group contains class II terpene cyclases, protein prenyltransferases beta subunit, two ... | 1–363    | 6.47e-39  |
| Prenyltrans     | pfam00432 | Prenyltransferase and squalene oxidase repeat;                                                  | 207–240  | 3.26e-04  |
| SQCY_1          | cd02892   | Squalene cyclase (SQCY) domain subgroup 1; found in class II terpene cyclases that have an ...  | 207–274  | 4.34e-03  |
| Prenyltrans_2   | pfam13249 | Prenyltransferase-like;                                                                         | 211–331  | 7.97e-09  |
| Prenyltrans_2   | pfam13249 | Prenyltransferase-like;                                                                         | 134–275  | 5.74e-08  |

Table S15. Cont.

|                 |           |                                                                                                         |         |           |
|-----------------|-----------|---------------------------------------------------------------------------------------------------------|---------|-----------|
| squalene_cyclas | TIGR01787 | squalene/oxidosqualene cyclases; This family of enzymes catalyzes the cyclization of the ...            | 3–363   | 1.19e-117 |
| PLN03012        | PLN03012  | Camelliol C synthase                                                                                    | 3–363   | 1.41e-106 |
| PLN02993        | PLN02993  | lupeol synthase                                                                                         | 3–369   | 4.48e-97  |
| osq_cycl        | TIGR03463 | 2,3-oxidosqualene cyclase; This model identifies 2,3-oxidosqualene cyclases from <i>Stigmatella</i> ... | 1–361   | 1.37e-91  |
| SqhC            | COG1657   | Squalene cyclase [Lipid metabolism]                                                                     | 3–367   | 4.95e-56  |
| hopene_cyclase  | TIGR01507 | squalene-hopene cyclase; SHC is an essential prokaryotic gene in hopanoid (triterpenoid) ...            | 5–369   | 9.84e-30  |
| squa_tetra_cyc  | TIGR04277 | squalene--tetrahymanol cyclase; This enzyme, also called squalene--tetrahymanol cyclase, ...            | 126–363 | 2.76e-10  |
| Prenyltrans_1   | pfam13243 | Prenyltransferase-like;                                                                                 | 207–274 | 1.62e-08  |
| Prenyltrans_2   | pfam13249 | Prenyltransferase-like;                                                                                 | 83–224  | 1.02e-03  |
| Prenyltrans_1   | pfam13243 | Prenyltransferase-like;                                                                                 | 129–270 | 1.31e-03  |

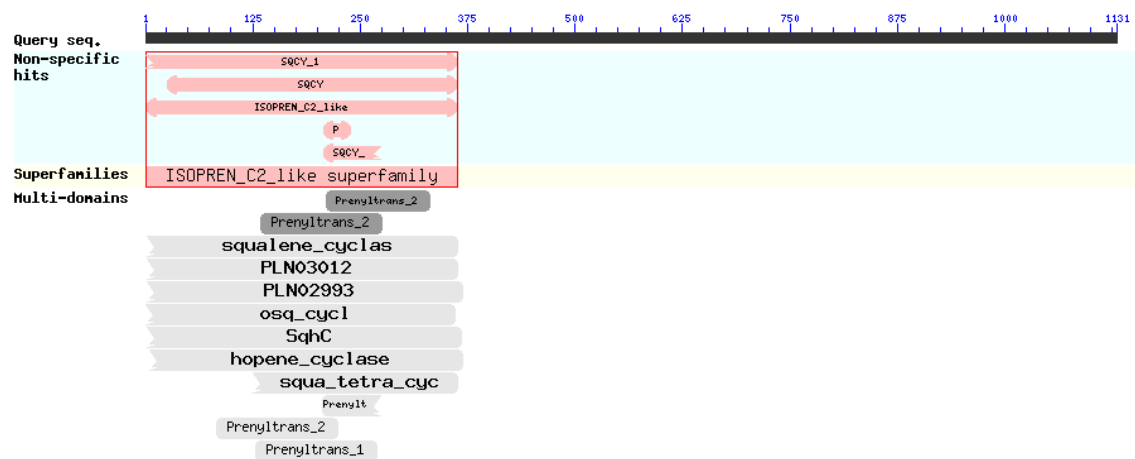

**Figure S15.** Conserved domains detected in a putative squalene-hopene/tetraprenyl-beta-curcumene cyclase gene from *L. dendroidea*, (edited from the NCBI CDD database, [1]).

**Table S16.** List of domain hits for the squalene-hopene/tetraprenyl-beta-curcumene cyclase gene from *Bradyrhizobium* sp. (tr|A4Z167 A4Z167\_BRASO).

| Name            | Accession | Description                                                                                     | Interval | E-Value   |
|-----------------|-----------|-------------------------------------------------------------------------------------------------|----------|-----------|
| SQCY_1          | cd02892   | Squalene cyclase (SQCY) domain subgroup 1; found in class II terpene cyclases that have an ...  | 26–677   | 0e+00     |
| SQCY            | cd02889   | Squalene cyclase (SQCY) domain; found in class II terpene cyclases that have an alpha 6—...     | 332–676  | 8.79e-130 |
| ISOPREN_C2_like | cd00688   | This group contains class II terpene cyclases, protein prenyltransferases beta subunit, two ... | 326–677  | 9.84e-39  |
| SQCY            | cd02889   | Squalene cyclase (SQCY) domain; found in class II terpene cyclases that have an alpha 6— ...    | 26–375   | 3.52e-08  |

Table S16. Cont.

|                 |           |                                                                                                  |         |           |
|-----------------|-----------|--------------------------------------------------------------------------------------------------|---------|-----------|
| ISOPREN_C2_like | cd00688   | This group contains class II terpene cyclases, protein prenyltransferases beta subunit, two ...  | 26–410  | 7.38e-08  |
| SQCY            | cd02889   | Squalene cyclase (SQCY) domain; found in class II terpene cyclases that have an alpha 6— ...     | 18–97   | 1.79e-07  |
| SQCY_1          | cd02892   | Squalene cyclase (SQCY) domain subgroup 1; found in class II terpene cyclases that have an ...   | 23–96   | 9.72e-07  |
| ISOPREN_C2_like | cd00688   | This group contains class II terpene cyclases, protein prenyltransferases beta subunit, two ...  | 17–132  | 4.24e-05  |
| SQCY            | cd02889   | Squalene cyclase (SQCY) domain; found in class II terpene cyclases that have an alpha 6— ...     | 17–129  | 8.21e-05  |
| SQCY_1          | cd02892   | Squalene cyclase (SQCY) domain subgroup 1; found in class II terpene cyclases that have an ...   | 17–129  | 1.16e-04  |
| Prenyltrans     | pfam00432 | Prenyltransferase and squalene oxidase repeat;                                                   | 493–535 | 3.52e-04  |
| Prenyltrans     | pfam00432 | Prenyltransferase and squalene oxidase repeat;                                                   | 541–583 | 5.36e-04  |
| hopene_cyclase  | TIGR01507 | squalene-hopene cyclase; SHC is an essential prokaryotic gene in hopanoid (triterpenoid) ...     | 26–676  | 0e+00     |
| squalene_cyclas | TIGR01787 | squalene/oxidosqualene cyclases; This family of enzymes catalyzes the cyclization of the ...     | 25–676  | 1.99e-157 |
| SqhC            | COG1657   | Squalene cyclase [Lipid metabolism]                                                              | 110–683 | 9.16e-74  |
| squa_tetra_cyc  | TIGR04277 | squalene—tetrahymanol cyclase; This enzyme, also called squalene—tetrahymanol cyclase, ...       | 77–681  | 6.52e-61  |
| osq_cycl        | TIGR03463 | 2,3-oxidosqualene cyclase; This model identifies 2,3-oxidosqualene cyclases from Stigmatella ... | 33–676  | 1.09e-49  |
| PLN02993        | PLN02993  | lupeol synthase                                                                                  | 18–566  | 6.57e-33  |
| PLN03012        | PLN03012  | Camelliol C synthase                                                                             | 24–675  | 9.97e-33  |
| Prenyltrans_2   | pfam13249 | Prenyltransferase-like;                                                                          | 431–562 | 4.07e-16  |
| Prenyltrans_1   | pfam13243 | Prenyltransferase-like;                                                                          | 495–614 | 2.09e-14  |

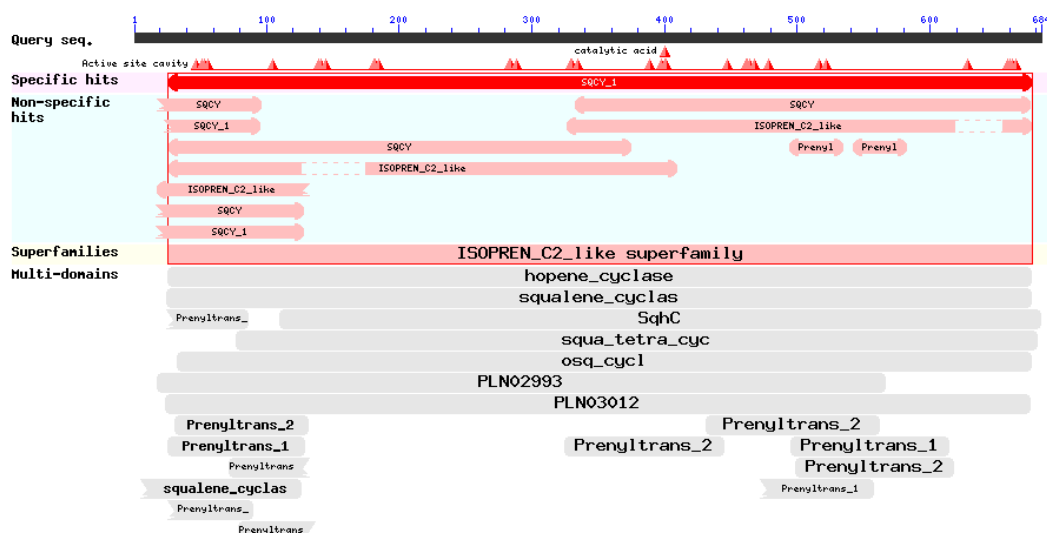

**Figure S16.** Conserved domains detected in the squalene-hopene/tetraprenyl-beta-curcumene cyclase gene from *Bradyrhizobium sp* (tr|A4Z167 A4Z167\_BRASO) (edited from the NCBI CDD database, [1]).

**Table S17.** List of domain hits for a putative lupeol synthase 1 gene from *L. dendroidea*.

| Name            | Accession | Description                                                                                             | Interval | E-Value   |
|-----------------|-----------|---------------------------------------------------------------------------------------------------------|----------|-----------|
| SQCY_1          | cd02892   | Squalene cyclase (SQCY) domain subgroup 1; found in class II terpene cyclases that have an ...          | 1363     | 5.98e-143 |
| SQCY            | cd02889   | Squalene cyclase (SQCY) domain; found in class II terpene cyclases that have an alpha 6 - ...           | 24–363   | 8.74e-126 |
| ISOPREN_C2_like | cd00688   | This group contains class II terpene cyclases, protein prenyltransferases beta subunit, two ...         | 1–363    | 6.47e-39  |
| Prenyltrans     | pfam00432 | Prenyltransferase and squalene oxidase repeat;                                                          | 207–240  | 3.26e-04  |
| SQCY_1          | cd02892   | Squalene cyclase (SQCY) domain subgroup 1; found in class II terpene cyclases that have an ...          | 207–274  | 4.34e-03  |
| Prenyltrans_2   | pfam13249 | Prenyltransferase-like;                                                                                 | 211–331  | 7.97e-09  |
| Prenyltrans_2   | pfam13249 | Prenyltransferase-like;                                                                                 | 134–275  | 5.74e-08  |
| squalene_cyclas | TIGR01787 | squalene/oxidosqualene cyclases; This family of enzymes catalyzes the cyclization of the ...            | 3–363    | 1.19e-117 |
| PLN03012        | PLN03012  | Camelliol C synthase                                                                                    | 3–363    | 1.41e-106 |
| PLN02993        | PLN02993  | lupeol synthase                                                                                         | 3–369    | 4.48e-97  |
| osq_cycl        | TIGR03463 | 2,3-oxidosqualene cyclase; This model identifies 2,3-oxidosqualene cyclases from <i>Stigmatella</i> ... | 1–361    | 1.37e-91  |
| SqhC            | COG1657   | Squalene cyclase [Lipid metabolism]                                                                     | 3–367    | 4.95e-56  |

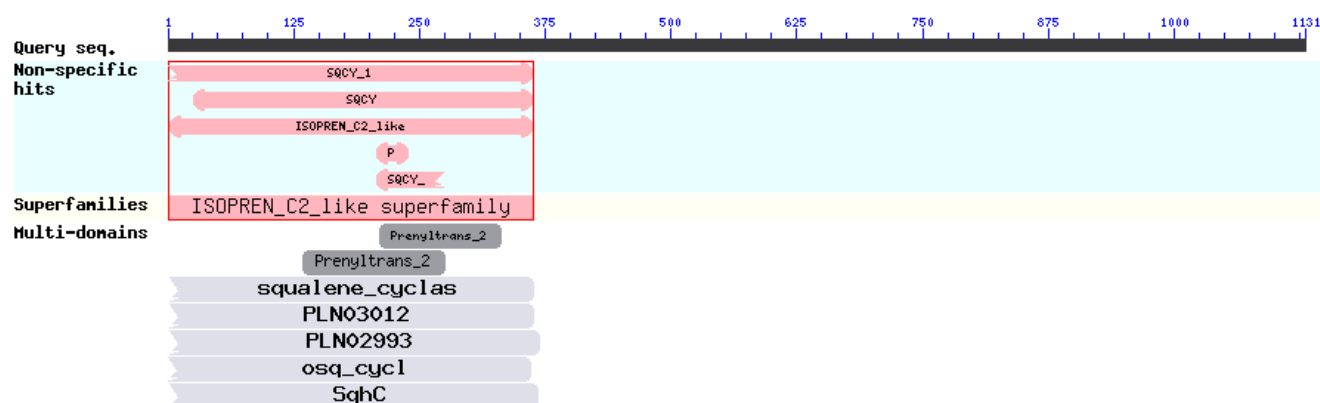**Figure S17.** Conserved domains detected in a putative lupeol synthase 1 gene from *L. dendroidea* (edited from the NCBI CDD database, [1]).

**Table S18.** List of domain hits for the lupeol synthase 1 gene from *Arabidopsis thaliana* (sp|Q9C5M3|LUP1\_ARATH).

| Name            | Accession | Description                                                                                    | Interval | E-Value  |
|-----------------|-----------|------------------------------------------------------------------------------------------------|----------|----------|
| SQCY_1          | cd02892   | Squalene cyclase (SQCY) domain subgroup 1; found in class II terpene cyclases that have an ... | 99–749   | 0e+00    |
| Prenyltrans     | pfam00432 | Prenyltransferase and squalene oxidase repeat;                                                 | 589–629  | 1.24e-07 |
| PLN02993        | PLN02993  | lupeol synthase                                                                                | 1–757    | 0e+00    |
| squalene_cyclas | TIGR01787 | squalene/oxidosqualene cyclases; This family of enzymes catalyzes the cyclization of the ...   | 98–751   | 0e+00    |
| SqhC            | COG1657   | Squalene cyclase [Lipid metabolism]                                                            | 186–749  | 3.47e-59 |
| Prenyltrans_2   | pfam13249 | Prenyltransferase-like                                                                         | 593–717  | 5.37e-15 |

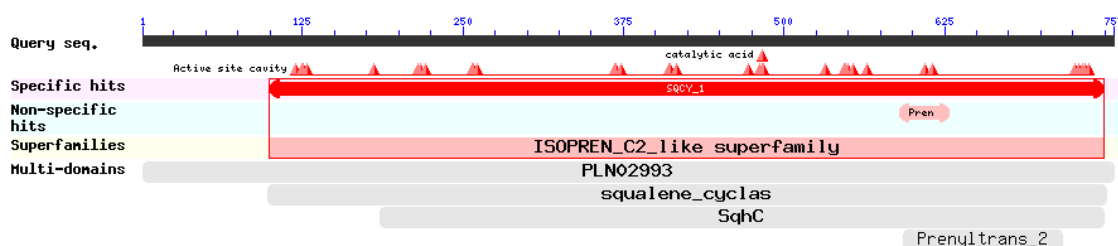

**Figure S18.** Conserved domains detected in the lupeol synthase 1 gene from *Arabidopsis thaliana* (sp|Q9C5M3|LUP1\_ARATH) (edited from the NCBI CDD database, [1]).

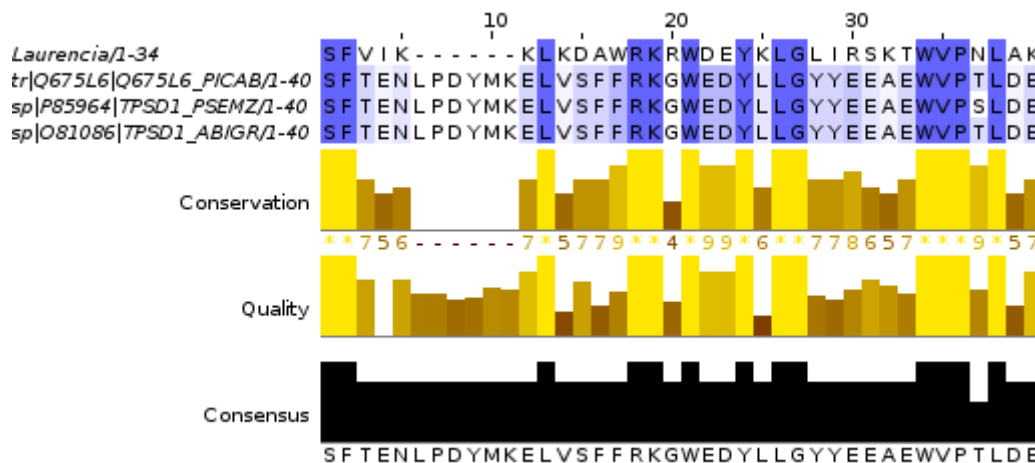

**Figure S19.** Multiple alignment analysis between a putative alpha-bisabolene synthase from *L. dendroidea* and alpha-bisabolene synthase reference sequences from *Picea abies*, *Pseudotsuga menziesii* and *Abies grandis* downloaded from Uniprot. The alignment was done using Muscle software [2] and visualized with Jalview [3].

**Table S19.** List of domain hits for the alpha-bisabolene synthase gene from *Picea abies* (tr|Q675L6 Q675L6\_PICAB).

| Name                     | Accession | Description                                                                                        | Interval | E-Value   |
|--------------------------|-----------|----------------------------------------------------------------------------------------------------|----------|-----------|
| Terpene_cyclase_plant_C1 | cd00684   | Plant Terpene Cyclases, Class 1; This CD includes a diverse group of monomeric plant terpene ...   | 271–804  | 0e+00     |
| Terpene_synth_C          | pfam03936 | Terpene synthase family, metal binding domain; It has been suggested that this gene family be ...  | 481–751  | 1.09e-97  |
| Terpene_cyclase_C1       | cd00868   | Terpene cyclases, Class 1; Terpene cyclases, Class 1 (C1) of the class 1 family of isoprenoid ...  | 495–775  | 3.12e-89  |
| Terpene_synth            | pfam01397 | Terpene synthase, N-terminal domain; It has been suggested that this gene family be designated ... | 246–439  | 6.37e-66  |
| Isoprenoid_Biosyn_C1     | cd00385   | Isoprenoid Biosynthesis enzymes, Class 1; Superfamily of trans-isoprenyl diphosphate synthases ... | 534–771  | 1.28e-29  |
| PLN02150                 | PLN02150  | terpene synthase/cyclase family protein                                                            | 714–807  | 1.15e-07  |
| ISOPREN_C2_like          | cd00688   | This group contains class II terpene cyclases, protein prenyltransferases beta subunit, two ...    | 73–156   | 3.94e-03  |
| PLN02279                 | PLN02279  | ent-kaur-16-ene synthase                                                                           | 60–807   | 5.06e-148 |
| PLN02592                 | PLN02592  | ent-copalyl diphosphate synthase                                                                   | 57–713   | 4.31e-165 |
| Prenyltrans_1            | pfam13243 | Prenyltransferase-like;                                                                            | 99–157   | 9.07e-04  |
| Prenyltrans_1            | pfam13243 | Prenyltransferase-like;                                                                            | 78-154   | 1.33e-03  |

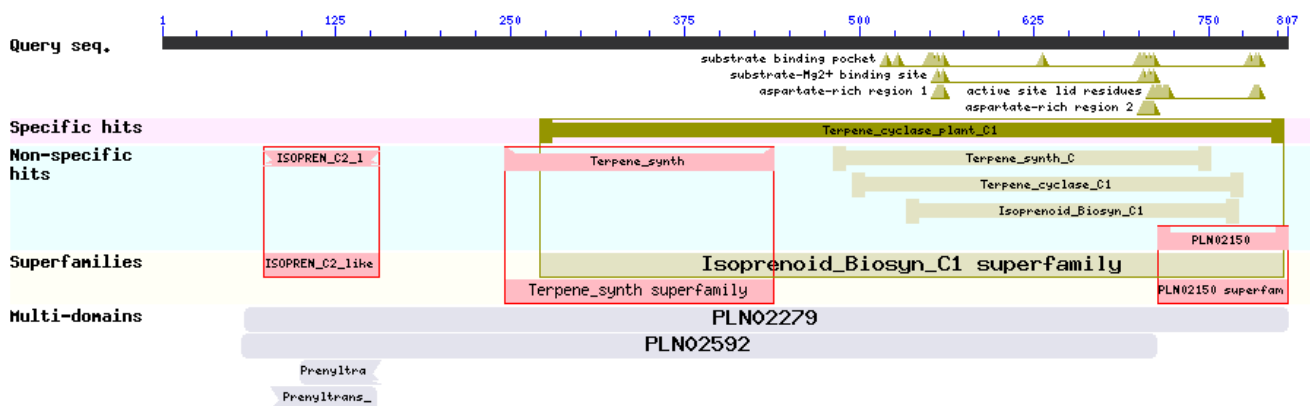**Figure S20.** Conserved domains detected in the alpha-bisabolene synthase gene from *Picea abies* (tr|Q675L6 Q675L6\_PICAB) (edited from the NCBI CDD database, [1]).



**Table S20.** List of domain hits for a putative germacrene-A synthase gene from *L. dendroidea*.

| Name                        | Accession | Description                                                                                             | Interval | E-Value  |
|-----------------------------|-----------|---------------------------------------------------------------------------------------------------------|----------|----------|
| Terpene_cyclase_nonplant_C1 | cd00687   | Non-plant Terpene Cyclases, Class 1;<br>This CD includes terpenoid cyclases<br>such as pentalenene ...  | 56-353   | 8.36e-25 |
| Terpene_cyclase_C1          | cd00868   | Terpene cyclases, Class 1; Terpene cyclases,<br>Class 1 (C1) of the class 1 family of<br>isoprenoid ... | 60-349   | 2.45e-11 |
| Terpene_synth_C             | pfam03936 | Terpene synthase family, metal binding domain;<br>It has been suggested that this gene family be ...    | 56-314   | 1.07e-04 |

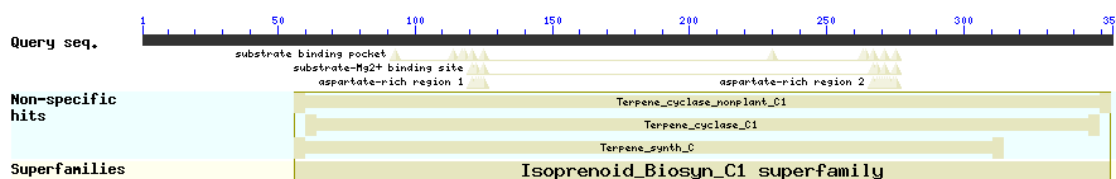**Figure S21.** Conserved domains detected in a putative germacrene-A synthase gene from *L. dendroidea* (edited from the NCBI CDD database, [1]).**Table S21.** List of domain hits for the germacrene-A synthase gene from *Nostoc punctiforme* (sp|B2J4A4 GERAS\_NOSP7).

| Name                        | Accession | Description                                                                                             | Interval | E-Value   |
|-----------------------------|-----------|---------------------------------------------------------------------------------------------------------|----------|-----------|
| Terpene_cyclase_nonplant_C1 | cd00687   | Non-plant Terpene Cyclases, Class 1;<br>This CD includes terpenoid cyclases<br>such as pentalenene ...  | 10-309   | 3.27e-123 |
| Terpene_cyclase_C1          | cd00868   | Terpene cyclases, Class 1; Terpene cyclases,<br>Class 1 (C1) of the class 1 family<br>of isoprenoid ... | 23-305   | 7.93e-51  |
| Terpene_synth_C             | pfam03936 | Terpene synthase family, metal binding<br>domain; It has been suggested that this gene<br>family be ... | 31-264   | 1.87e-20  |

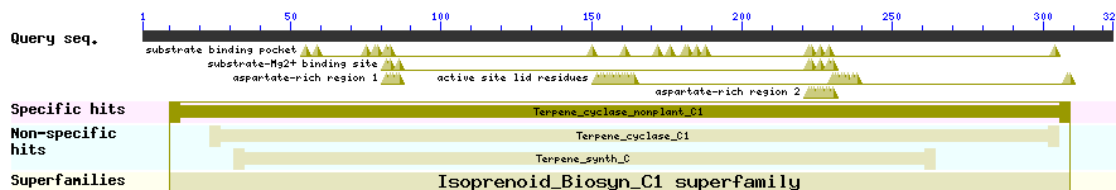**Figure S22.** Conserved domains detected in the germacrene-A synthase gene from *Nostoc punctiforme* (sp|B2J4A4 GERAS\_NOSP7) (edited from the NCBI CDD database, [1]).

**Table S22.** List of domain hits for a putative germacrene A oxidase gene from *L. dendroidea*.

| Name     | Accession | Description                                                                                | Interval | E-Value  |
|----------|-----------|--------------------------------------------------------------------------------------------|----------|----------|
| p450     | pfam00067 | Cytochrome P450; Cytochrome P450s are haem-thiolate proteins involved in the oxidative ... | 367–564  | 1.03e-44 |
| CypX     | COG2124   | Cytochrome P450 [Secondary metabolites biosynthesis, transport, and catabolism]            | 367–535  | 3.07e-31 |
| PLN02687 | PLN02687  | flavonoid 3'-monooxygenase                                                                 | 370–531  | 6.05e-21 |
| PTZ00404 | PTZ00404  | cytochrome P450; Provisional                                                               | 370–539  | 3.35e-18 |
| PLN02738 | PLN02738  | carotene beta-ring hydroxylase                                                             | 370–534  | 1.21e-17 |

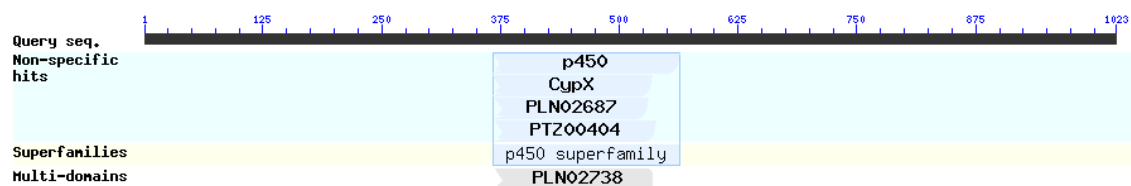**Figure S23.** Conserved domains detected in a putative germacrene A oxidase gene from *L. dendroidea* (edited from the NCBI CDD database [1]).**Table S23.** List of domain hits for the germacrene A oxidase gene from *Cichorium intybus* (sp|D5JBW8|GAO\_CICIN).

| Name     | Accession | Description                                                                                | Interval | E-value   |
|----------|-----------|--------------------------------------------------------------------------------------------|----------|-----------|
| PLN02687 | PLN02687  | flavonoid 3'-monooxygenase                                                                 | 5–486    | 4.19e-134 |
| p450     | pfam00067 | Cytochrome P450; Cytochrome P450s are haem-thiolate proteins involved in the oxidative ... | 33–460   | 7.76e-99  |
| PTZ00404 | PTZ00404  | cytochrome P450; Provisional                                                               | 5–477    | 1.31e-56  |
| CypX     | COG2124   | Cytochrome P450 [Secondary metabolites biosynthesis, transport, and catabolism]            | 67–460   | 1.34e-38  |
| PLN02738 | PLN02738  | carotene beta-ring hydroxylase                                                             | 31–487   | 6.67e-29  |

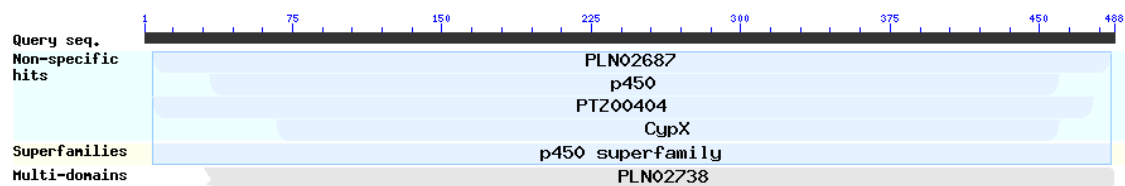**Figure S24.** Conserved domains detected in the germacrene A oxidase gene from *Cichorium intybus* (sp|D5JBW8|GAO\_CICIN) (edited from the NCBI CDD database, [1]).

**Table S24.** List of domain hits for a putative aristolochene synthase gene from *L. dendroidea*.

| Name                        | Accession | Description                                                                                        | Interval | E-Value  |
|-----------------------------|-----------|----------------------------------------------------------------------------------------------------|----------|----------|
| Terpene_cyclase_nonplant_C1 | cd00687   | Non-plant Terpene Cyclases, Class 1;<br>This CD includes terpenoid cyclases<br>such as pentalenene | 56–353   | 8.36e-25 |
| Terpene_cyclase_C1          | cd00868   | Terpene cyclases, Class 1; Terpene cyclases,<br>Class 1 (C1) of the class 1 family of isoprenoid   | 60–349   | 2.45e-11 |
| Terpene_synth_C             | pfam03936 | Terpene synthase family, metal binding domain;<br>It has been suggested that this gene family be   | 56–314   | 1.07e-04 |

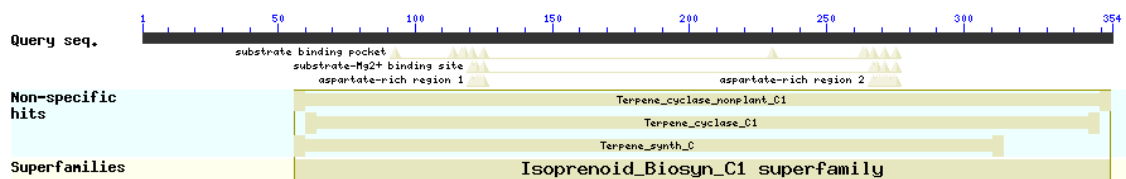**Figure S25.** Conserved domains detected in a putative aristolochene synthase gene from *L. dendroidea* (edited from the NCBI CDD database, [1]).**Table S25.** List of domain hits for the aristolochene synthase gene from *Aspergillus terreus* (sp|Q9UR08 ARIS\_ASPTTE).

| Name                        | Accession | Description                                                                                          | Interval | E-Value  |
|-----------------------------|-----------|------------------------------------------------------------------------------------------------------|----------|----------|
| Terpene_cyclase_nonplant_C1 | cd00687   | Non-plant Terpene Cyclases, Class 1;<br>This CD includes terpenoid cyclases<br>such as pentalenene   | 18–312   | 1.26e-98 |
| Terpene_cyclase_C1          | cd00868   | Terpene cyclases, Class 1; Terpene cyclases,<br>Class 1 (C1) of the class 1 family of isoprenoid     | 28–308   | 6.00e-32 |
| Terpene_synth_C             | pfam03936 | Terpene synthase family, metal binding domain;<br>It has been suggested that this gene family be     | 21–269   | 2.55e-30 |
| Isoprenoid_Biosyn_C1        | cd00385   | Isoprenoid Biosynthesis enzymes, Class 1;<br>Superfamily of trans-isoprenyl<br>diphosphate synthases | 63–280   | 6.29e-09 |

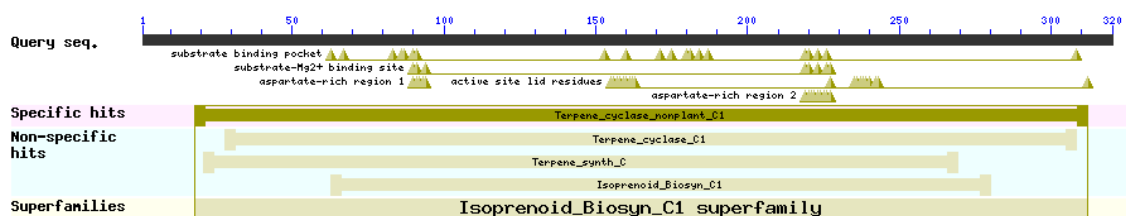**Figure S26.** Conserved domains detected in the aristolochene synthase gene from *Aspergillus terreus* (sp|Q9UR08 ARIS\_ASPTTE) (edited from the NCBI CDD database, [1]).

**Table S26.** List of domain hits for a putative 5-epiaristolochene 1,3-dihydroxylase gene from *L. dendroidea*.

| Name     | Accession | Description                                                                                | Interval | E-Value  |
|----------|-----------|--------------------------------------------------------------------------------------------|----------|----------|
| p450     | pfam00067 | Cytochrome P450; Cytochrome P450s are haem-thiolate proteins involved in the oxidative ... | 367–564  | 1.10e-44 |
| CypX     | COG2124   | Cytochrome P450 [Secondary metabolites biosynthesis, transport, and catabolism]            | 367–535  | 3.30e-31 |
| PLN02687 | PLN02687  | flavonoid 3'-monooxygenase                                                                 | 370–531  | 5.92e-21 |
| PLN02183 | PLN02183  | ferulate 5-hydroxylase                                                                     | 367–530  | 2.79e-20 |
| PLN02302 | PLN02302  | ent-kaurenoic acid oxidase                                                                 | 384–551  | 1.27e-19 |
| PLN02966 | PLN02966  | cytochrome P450 83A1                                                                       | 367–548  | 3.18e-19 |
| PLN02394 | PLN02394  | trans-cinnamate 4-monooxygenase                                                            | 373–521  | 8.60e-19 |
| PLN02655 | PLN02655  | ent-kaurene oxidase                                                                        | 371–517  | 2.94e-18 |
| PTZ00404 | PTZ00404  | cytochrome P450; Provisional                                                               | 370–539  | 3.54e-18 |
| PLN03195 | PLN03195  | fatty acid omega-hydroxylase; Provisional                                                  | 367–529  | 1.14e-17 |
| PLN03234 | PLN03234  | cytochrome P450 83B1; Provisional                                                          | 367–526  | 1.40e-16 |
| PLN02290 | PLN02290  | cytokinin trans-hydroxylase                                                                | 373–540  | 5.60e-16 |
| PLN02936 | PLN02936  | epsilon-ring hydroxylase                                                                   | 370–529  | 6.75e-16 |
| PLN02196 | PLN02196  | abscisic acid 8'-hydroxylase                                                               | 367–538  | 1.04e-15 |
| PLN00110 | PLN00110  | flavonoid 3',5'-hydroxylase (F3'5'H); Provisional                                          | 367–521  | 1.60e-15 |
| PLN02169 | PLN02169  | fatty acid (omega-1)-hydroxylase/midchain alkane hydroxylase                               | 367–537  | 4.63e-15 |
| PLN02426 | PLN02426  | cytochrome P450, family 94, subfamily C protein                                            | 367–545  | 6.97e-15 |
| PLN02500 | PLN02500  | cytochrome P450 90B1                                                                       | 413–536  | 3.43e-14 |
| PLN03112 | PLN03112  | cytochrome P450 family protein; Provisional                                                | 370–524  | 9.26e-13 |
| PLN02987 | PLN02987  | Cytochrome P450, family 90, subfamily A                                                    | 367–536  | 1.95e-12 |
| PLN03141 | PLN03141  | 3-epi-6-deoxocathasterone 23-monooxygenase; Provisional                                    | 365–535  | 4.81e-09 |
| PLN02774 | PLN02774  | brassinosteroid-6-oxidase                                                                  | 367–524  | 5.38e-09 |
| PLN00168 | PLN00168  | Cytochrome P450; Provisional                                                               | 371–525  | 2.91e-08 |
| PLN03018 | PLN03018  | homomethionine N-hydroxylase                                                               | 384–520  | 4.02e-08 |
| PLN02971 | PLN02971  | tryptophan N-hydroxylase                                                                   | 370–522  | 4.17e-08 |
| PLN02648 | PLN02648  | allene oxide synthase                                                                      | 412–489  | 8.49e-08 |
| PLN02738 | PLN02738  | carotene beta-ring hydroxylase                                                             | 370–534  | 1.28e-17 |

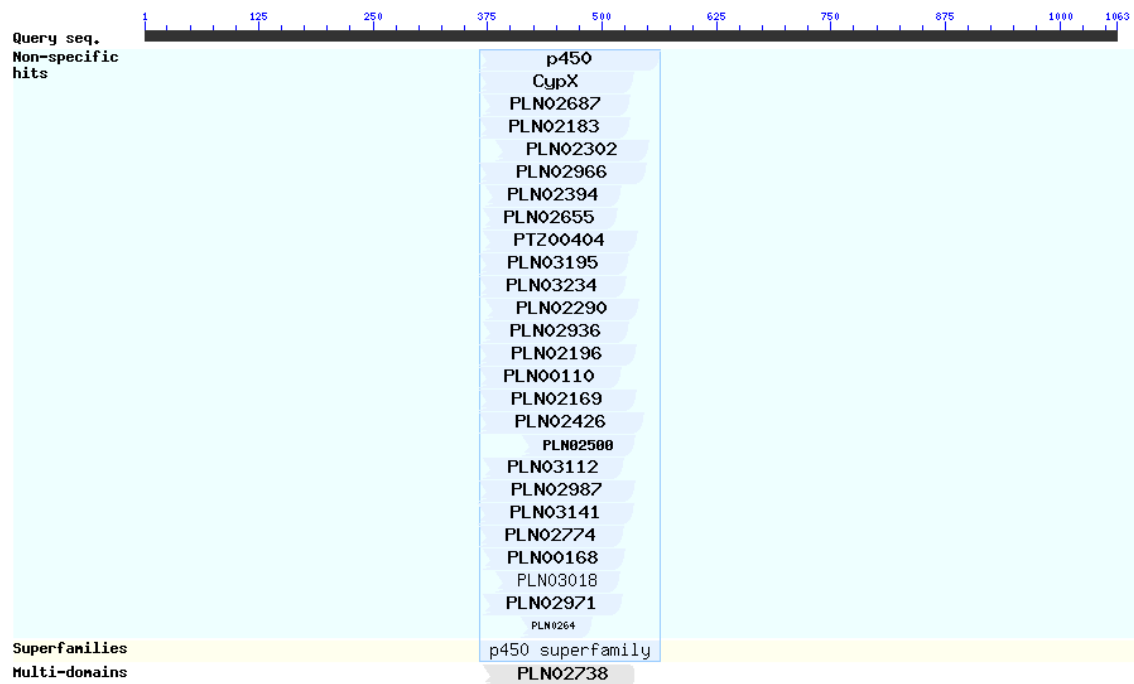

**Figure S27.** Conserved domains detected in a putative 5-epiaristolochene 1,3-dihydroxylase gene from *L. dendroidea* (edited from the NCBI CDD database, [1]).

**Table S27.** List of domain hits for the 5-epiaristolochene 1,3-dihydroxylase gene from *Nicotiana tabacum* (sp|Q94FM7|C71DK\_TOBAC).

| Name     | Accession | Description                                                                                | Interval | E-Value   |
|----------|-----------|--------------------------------------------------------------------------------------------|----------|-----------|
| PLN02183 | PLN02183  | ferulate 5-hydroxylase                                                                     | 33–488   | 9.91e-128 |
| PLN02687 | PLN02687  | flavonoid 3'-monooxygenase                                                                 | 30–498   | 5.87e-123 |
| PLN03112 | PLN03112  | cytochrome P450 family protein; Provisional                                                | 4–498    | 6.11e-114 |
| p450     | pfam00067 | Cytochrome P450; Cytochrome P450s are haem-thiolate proteins involved in the oxidative ... | 33–494   | 2.34e-109 |
| PLN03234 | PLN03234  | cytochrome P450 83B1; Provisional                                                          | 23–499   | 4.35e-109 |
| PLN02966 | PLN02966  | cytochrome P450 83A1                                                                       | 22–494   | 2.38e-103 |
| PLN00110 | PLN00110  | flavonoid 3',5'-hydroxylase (F3'5'H); Provisional                                          | 29–498   | 2.76e-102 |
| PLN02394 | PLN02394  | trans-cinnamate 4-monooxygenase                                                            | 31–483   | 1.57e-81  |
| PLN02971 | PLN02971  | tryptophan <i>N</i> -hydroxylase                                                           | 25–468   | 5.45e-60  |
| PLN02655 | PLN02655  | ent-kaurene oxidase                                                                        | 34–498   | 8.16e-59  |
| PLN00168 | PLN00168  | Cytochrome P450; Provisional                                                               | 20–466   | 4.94e-57  |
| PLN03018 | PLN03018  | homomethionine <i>N</i> -hydroxylase                                                       | 25–477   | 8.67e-54  |
| PTZ00404 | PTZ00404  | cytochrome P450; Provisional                                                               | 24–486   | 1.12e-53  |
| CypX     | COG2124   | Cytochrome P450 [Secondary metabolites biosynthesis, transport, and catabolism]            | 33–470   | 4.01e-43  |
| PLN02936 | PLN02936  | epsilon-ring hydroxylase                                                                   | 62–497   | 5.84e-36  |
| PLN02302 | PLN02302  | ent-kaurenoic acid oxidase                                                                 | 234–463  | 4.10e-28  |
| PLN03195 | PLN03195  | fatty acid omega-hydroxylase; Provisional                                                  | 27–463   | 5.47e-27  |

Table S27. Cont.

|          |          |                                                              |         |          |
|----------|----------|--------------------------------------------------------------|---------|----------|
| PLN02290 | PLN02290 | cytokinin trans-hydroxylase                                  | 219–463 | 1.48e-25 |
| PLN02987 | PLN02987 | Cytochrome P450, family 90, subfamily A                      | 31–465  | 2.75e-23 |
| PLN02196 | PLN02196 | abscisic acid 8'-hydroxylase                                 | 3–467   | 2.78e-21 |
| PLN02774 | PLN02774 | brassinosteroid-6-oxidase                                    | 233–463 | 1.42e-20 |
| PLN02169 | PLN02169 | fatty acid (omega-1)-hydroxylase/midchain alkane hydroxylase | 230–470 | 3.80e-20 |
| PLN03141 | PLN03141 | 3-epi-6-deoxocathasterone 23-monooxygenase; Provisional      | 234–465 | 1.83e-18 |
| PLN02426 | PLN02426 | cytochrome P450, family 94, subfamily C protein              | 122–444 | 3.98e-15 |
| PLN02500 | PLN02500 | cytochrome P450 90B1                                         | 233–467 | 2.22e-14 |
| PLN02648 | PLN02648 | allene oxide synthase                                        | 331–418 | 7.72e-06 |
| PLN02738 | PLN02738 | carotene beta-ring hydroxylase                               | 269–497 | 3.46e-34 |

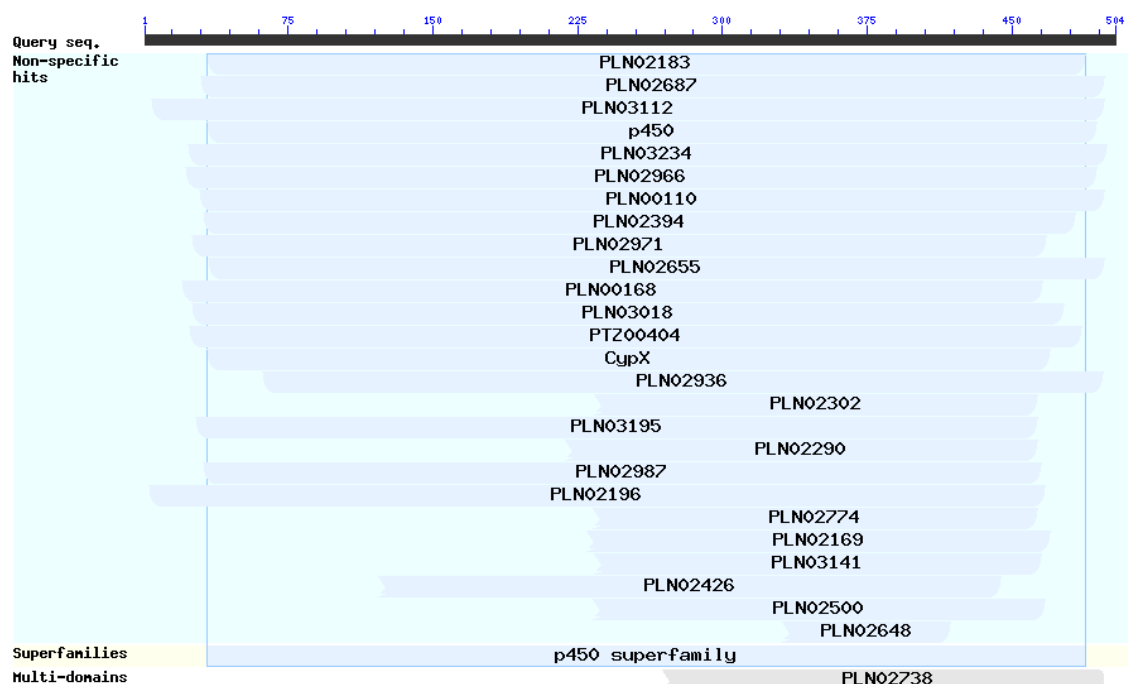

**Figure S28.** Conserved domains detected in the 5-epiaristolochene 1,3-dihydroxylase gene from *Nicotiana tabacum* (sp|Q94FM7|C71DK\_TOBAC) (edited from the NCBI CDD database, [1]).

**Table S28.** List of domain hits for a putative pentalenene synthase gene from *L. dendroidea*.

| Name                        | Accession | Description                                                                                             | Interval | E-value  |
|-----------------------------|-----------|---------------------------------------------------------------------------------------------------------|----------|----------|
| Terpene_cyclase_nonplant_C1 | cd00687   | Non-plant Terpene Cyclases, Class 1;<br>This CD includes terpenoid cyclases<br>such as pentalenene ...  | 11–298   | 3.90e-21 |
| Terpene_cyclase_C1          | cd00868   | Terpene cyclases, Class 1; Terpene<br>cyclases, Class 1 (C1) of the class 1 family<br>of isoprenoid ... | 15–282   | 4.15e-09 |
| Terpene_synth_C             | pfam03936 | Terpene synthase family, metal binding domain;<br>It has been suggested that this gene family be ...    | 15–262   | 2.96e-04 |

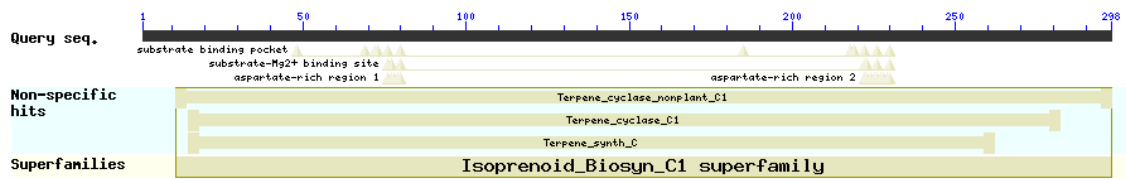

**Figure S29.** Conserved domains detected in a putative pentalenene synthase gene from *L. dendroidea* (edited from the NCBI CDD database, [1]).

**Table S29.** List of domain hits for the pentalenene synthase gene from *Streptomyces exfoliatus* (sp|Q55012 PENA\_STREX).

| Name                        | Accession | Description                                                                                        | Interval | E-Value   |
|-----------------------------|-----------|----------------------------------------------------------------------------------------------------|----------|-----------|
| Terpene_cyclase_nonplant_C1 | cd00687   | Non-plant Terpene Cyclases, Class 1; This CD includes terpenoid cyclases such as pentalenene ...   | 8–313    | 2.37e-108 |
| Terpene_cyclase_C1          | cd00868   | Terpene cyclases, Class 1; Terpene cyclases, Class 1 (C1) of the class 1 family of isoprenoid ...  | 19–309   | 4.49e-41  |
| Terpene_synth_C             | pfam03936 | Terpene synthase family, metal binding domain; It has been suggested that this gene family be ...  | 29–265   | 1.57e-34  |
| Isoprenoid_Biosyn_C1        | cd00385   | Isoprenoid Biosynthesis enzymes, Class 1; Superfamily of trans-isoprenyl diphosphate synthases ... | 72–292   | 9.90e-10  |

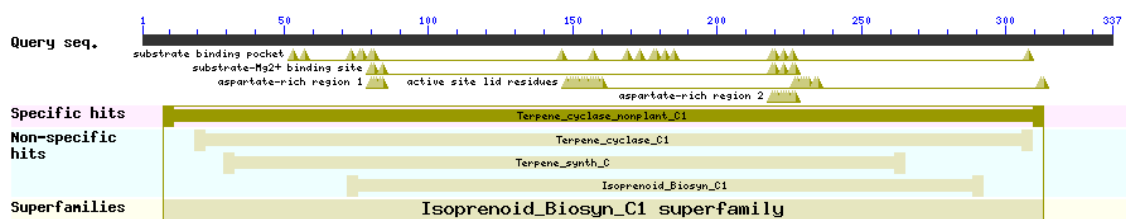

**Figure S30.** Conserved domains detected in the pentalenene synthase gene from *Streptomyces exfoliatus* (sp|Q55012 PENA\_STREX) (edited from the NCBI CDD database, [1]).

**Table S30.** List of domain hits for a putative zerumbone synthase gene from *L. dendroidea*.

| Name         | Accession | Description                                                                                   | Interval | E-Value  |
|--------------|-----------|-----------------------------------------------------------------------------------------------|----------|----------|
| SDR_c        | cd05233   | classical (c) SDRs; SDRs are a functionally diverse family of oxidoreductases that have a ... | 44–275   | 1.22e-32 |
| fabG         | PRK06550  | 3-ketoacyl-(acyl-carrier-protein) reductase; Provisional                                      | 41–233   | 4.23e-17 |
| adh_short_C2 | pfam13561 | Enoyl-(Acyl carrier protein) reductase;                                                       | 51–278   | 1.00e-07 |

Table S30. Cont.

|                                    |            |                                                                                                  |        |          |
|------------------------------------|------------|--------------------------------------------------------------------------------------------------|--------|----------|
| PKS_KR                             | smart00822 | This enzymatic domain is part of bacterial polyketide synthases; It catalyses the first step ... | 42–132 | 1.88e-05 |
| FabG                               | COG1028    | Dehydrogenases with different specificities (related to short-chain alcohol dehydrogenases) ...  | 39–278 | 2.19e-34 |
| fabG                               | PRK05565   | 3-ketoacyl-(acyl-carrier-protein) reductase; Provisional                                         | 38–242 | 7.99e-26 |
| PHB_DH                             | TIGR01963  | 3-hydroxybutyrate dehydrogenase; This model represents a subfamily of the short chain ...        | 41–279 | 1.08e-22 |
| adh_short                          | pfam00106  | short chain dehydrogenase; This family contains a wide variety of dehydrogenases.                | 42–209 | 1.95e-16 |
| PLN02253                           | PLN02253   | xanthoxin dehydrogenase                                                                          | 36–224 | 2.44e-13 |
| secoisolariciresinol-DH_like_SDR_c | cd05326    | secoisolariciresinol dehydrogenase (secoisolariciresinol-DH)-like, classical (c) SDRs;           | 38–225 | 1.86e-15 |

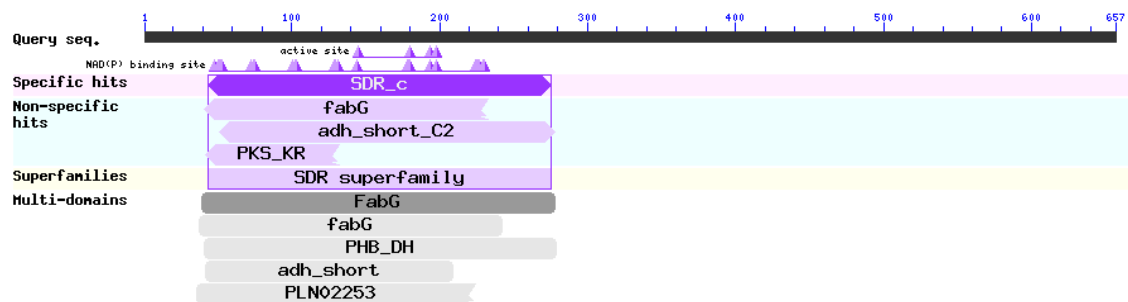

**Figure S31.** Conserved domains detected in a putative zerumbone synthase gene from *L. dendroidea* (edited from the NCBI CDD database, [1]).

**Table S31.** List of domain hits for the zerumbone synthase gene from *Zingiber zerumbet* (sp|F1SWA0|ZERSY\_ZINZE).

| Name                               | Accession  | Description                                                                                      | Interval | E-Value   |
|------------------------------------|------------|--------------------------------------------------------------------------------------------------|----------|-----------|
| secoisolariciresinol-DH_like_SDR_c | cd05326    | secoisolariciresinol dehydrogenase (secoisolariciresinol-DH)-like, classical (c) SDRs; ...       | 2–257    | 5.98e-118 |
| PRK07069                           | PRK07069   | short chain dehydrogenase; Validated                                                             | 8–257    | 5.07e-52  |
| adh_short_C2                       | pfam13561  | Enoyl-(Acyl carrier protein) reductase;                                                          | 12–257   | 2.29e-27  |
| PKS_KR                             | smart00822 | This enzymatic domain is part of bacterial polyketide synthases; It catalyses the first step ... | 6–151    | 2.29e-08  |
| PLN02730                           | PLN02730   | enoyl-[acyl-carrier-protein] reductase                                                           | 122–255  | 1.58e-04  |



Table S31. Cont.

|                |           |                                                                                                  |       |           |
|----------------|-----------|--------------------------------------------------------------------------------------------------|-------|-----------|
| PLN02253       | PLN02253  | xanthoxin dehydrogenase                                                                          | 2–267 | 1.11e-165 |
| fabG           | PRK07231  | 3-ketoacyl-(acyl-carrier-protein) reductase; Provisional                                         | 1–258 | 4.45e-76  |
| FabG           | COG1028   | Dehydrogenases with different specificities (related to short-chain alcohol dehydrogenases) ...  | 1–257 | 9.62e-59  |
| 3oxo_ACP_reduc | TIGR01830 | 3-oxoacyl-(acyl-carrier-protein) reductase; This model represents 3-oxoacyl-[ACP] reductase, ... | 8–255 | 2.40e-55  |
| adh_short      | pfam00106 | short chain dehydrogenase; This family contains a wide variety of dehydrogenases.                | 6–173 | 4.49e-30  |

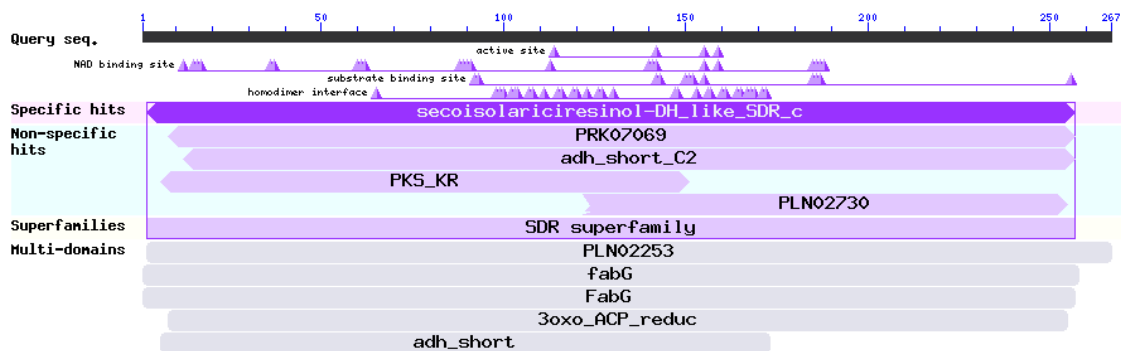

**Figure S32.** Conserved domains detected in the zerumbone synthase gene from *Zingiber zerumbet* (sp|F1SWA0|ZERSY\_ZINZE) (edited from the NCBI CDD database, [1]).

**Table S32.** List of domain hits for a putative gibberellin 20-oxidase gene from *L. dendroidea*.

| Name         | Accession | Description                                                                                                        | Interval  | E-Value  |
|--------------|-----------|--------------------------------------------------------------------------------------------------------------------|-----------|----------|
| DIOX_N       | pfam14226 | non-haem dioxygenase in morphine synthesis <i>N</i> -terminal; This is the highly conserved <i>N</i> -terminal ... | 2129–2401 | 2.84e-12 |
| 2OG-FeII_Oxy | pfam03171 | 2OG-Fe(II) oxygenase superfamily; This family contains members of the 2-oxoglutarate (2OG) and ...                 | 1616–1954 | 7.56e-09 |
| PTZ00273     | PTZ00273  | oxidase reductase; Provisional                                                                                     | 1508–2443 | 8.96e-24 |
| PcbC         | COG3491   | Isopenicillin N synthase and related dioxygenases [General function prediction only]                               | 1595–2419 | 5.94e-29 |
| PLN02485     | PLN02485  | Oxidoreductase                                                                                                     | 1511–2497 | 2.50e-19 |
| PLN03002     | PLN03002  | oxidoreductase, 2OG-Fe(II) oxygenase family protein                                                                | 1508–2362 | 6.26e-18 |
| PLN02750     | PLN02750  | oxidoreductase, 2OG-Fe(II) oxygenase family protein                                                                | 1517–2443 | 1.70e-12 |
| PLN02393     | PLN02393  | leucoanthocyanidin dioxygenase like protein                                                                        | 1529–2521 | 1.25e-11 |
| PLN02276     | PLN02276  | gibberellin 20-oxidase                                                                                             | 1598–2497 | 1.94e-10 |

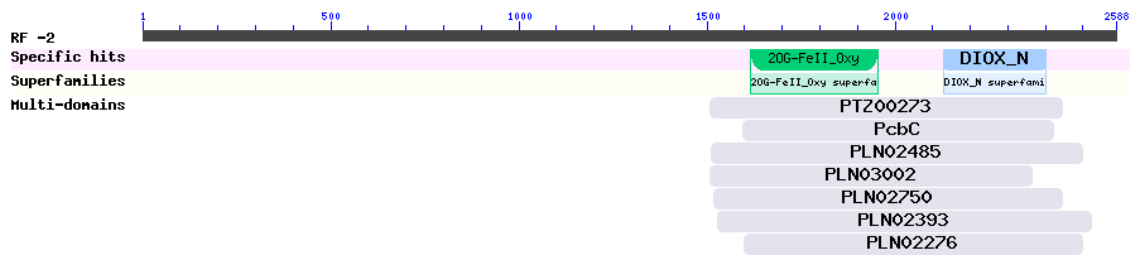

**Figure S33.** Conserved domains detected in a putative gibberelin 20-oxidase gene from *L. dendroidea* (edited from the NCBI CDD database, [1]).

**Table S33.** List of domain hits for the gibberelin 20-oxidase gene from *Arabidopsis thaliana* (gi|60390168|sp|Q39112.1|GAOX3\_ARATH).

| Name         | Accession | Description                                                                                                        | Interval | E-value  |
|--------------|-----------|--------------------------------------------------------------------------------------------------------------------|----------|----------|
| 2OG-FeII_Oxy | pfam03171 | 2OG-Fe(II) oxygenase superfamily; This family contains members of the 2-oxoglutarate (2OG) and ...                 | 222–321  | 3.06e-39 |
| DIOX_N       | pfam14226 | non-haem dioxygenase in morphine synthesis <i>N</i> -terminal; This is the highly conserved <i>N</i> -terminal ... | 58–160   | 3.86e-21 |
| PLN03176     | PLN03176  | flavanone-3-hydroxylase; Provisional                                                                               | 41–137   | 1.49e-05 |
| PLN02276     | PLN02276  | gibberellin 20-oxidase                                                                                             | 17–380   | 0e+00    |
| PLN02393     | PLN02393  | leucoanthocyanidin dioxygenase like protein                                                                        | 37–334   | 9.01e-65 |
| PLN02254     | PLN02254  | gibberellin 3-beta-dioxygenase                                                                                     | 22–360   | 7.45e-62 |
| PLN03178     | PLN03178  | leucoanthocyanidin dioxygenase; Provisional                                                                        | 37–354   | 5.59e-61 |
| PLN02912     | PLN02912  | oxidoreductase, 2OG-Fe(II) oxygenase family protein                                                                | 36–370   | 4.36e-60 |
| PLN02639     | PLN02639  | oxidoreductase, 2OG-Fe(II) oxygenase family protein                                                                | 26–350   | 4.80e-58 |
| PLN02758     | PLN02758  | oxidoreductase, 2OG-Fe(II) oxygenase family protein                                                                | 37–360   | 6.27e-57 |
| PLN02750     | PLN02750  | oxidoreductase, 2OG-Fe(II) oxygenase family protein                                                                | 37–353   | 3.35e-53 |
| PcbC         | COG3491   | Isopenicillin <i>N</i> synthase and related dioxygenases<br>[General function prediction only]                     | 54–361   | 5.21e-52 |

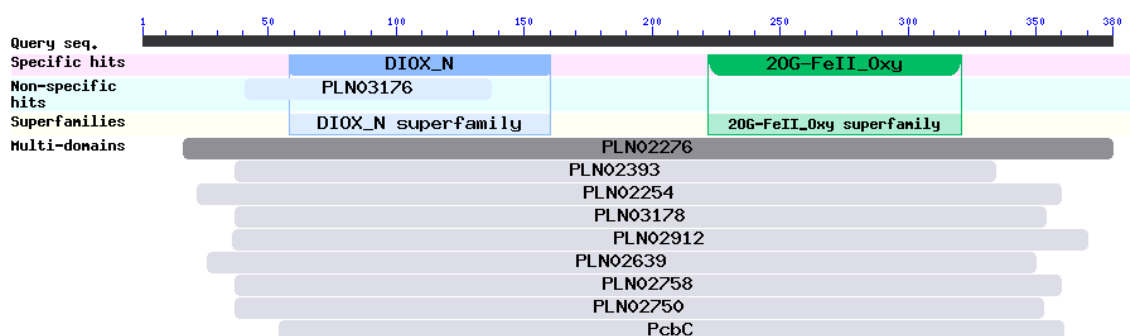

**Figure S34.** Conserved domains detected in the gibberelin 20-oxidase gene from *Arabidopsis thaliana* (gi|60390168|sp|Q39112.1|GAOX3\_ARATH) (edited from the NCBI CDD database, [1]).

**Table S34.** List of domain hits for a putative gibberelin 2-oxidase gene from *L. dendroidea*.

| Name         | Accession | Description                                                                                                        | Interval | E-Value  |
|--------------|-----------|--------------------------------------------------------------------------------------------------------------------|----------|----------|
| DIOX_N       | pfam14226 | non-haem dioxygenase in morphine synthesis <i>N</i> -terminal; This is the highly conserved <i>N</i> -terminal ... | 97–471   | 4.75e-09 |
| 2OG-FeII_Oxy | pfam03171 | 2OG-Fe(II) oxygenase superfamily; This family contains members of the 2-oxoglutarate (2OG) and ...                 | 610–927  | 4.13e-07 |
| PTZ00273     | PTZ00273  | oxidase reductase; Provisional                                                                                     | 94–1035  | 1.91e-32 |
| PcbC         | COG3491   | Isopenicillin <i>N</i> synthase and related dioxygenases [General function prediction only]                        | 85–948   | 1.05e-32 |
| PLN02485     | PLN02485  | oxidoreductase                                                                                                     | 91–873   | 1.63e-15 |
| PLN03002     | PLN03002  | oxidoreductase, 2OG-Fe(II) oxygenase family protein                                                                | 214–1056 | 2.60e-09 |
| PLN02156     | PLN02156  | gibberellin 2-beta-dioxygenase                                                                                     | 79–873   | 3.20e-08 |

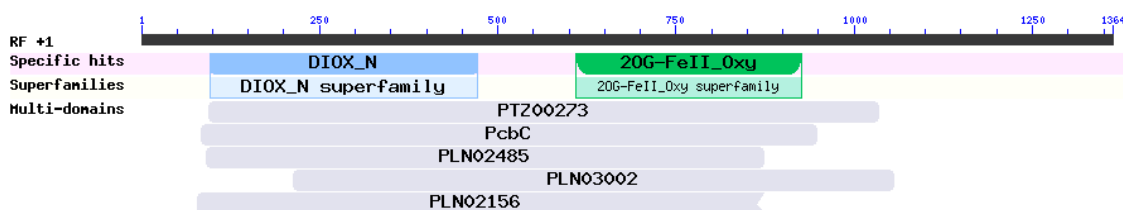**Figure S35.** Conserved domains detected in a putative gibberelin 2-oxidase gene from *L. dendroidea* (edited from the NCBI CDD database, [1]).**Table S35.** List of domain hits for the the gibberelin 2-oxidase gene from *Arabidopsis thaliana*.

| Name         | Accession | Description                                                                                                        | Interval | E-Value  |
|--------------|-----------|--------------------------------------------------------------------------------------------------------------------|----------|----------|
| 2OG-FeII_Oxy | pfam03171 | 2OG-Fe(II) oxygenase superfamily; This family contains members of the 2-oxoglutarate (2OG) and ...                 | 157–269  | 3.98e-28 |
| DIOX_N       | pfam14226 | non-haem dioxygenase in morphine synthesis <i>N</i> -terminal; This is the highly conserved <i>N</i> -terminal ... | 15–108   | 9.31e-20 |
| PLN03176     | PLN03176  | flavanone-3-hydroxylase; Provisional                                                                               | 9–71     | 3.40e-09 |
| PcbC         | COG3491   | Isopenicillin <i>N</i> synthase and related dioxygenases [General function prediction only]                        | 13–309   | 1.14e-49 |
| PLN02156     | PLN02156  | gibberellin 2-beta-dioxygenase                                                                                     | 15–316   | 7.18e-98 |

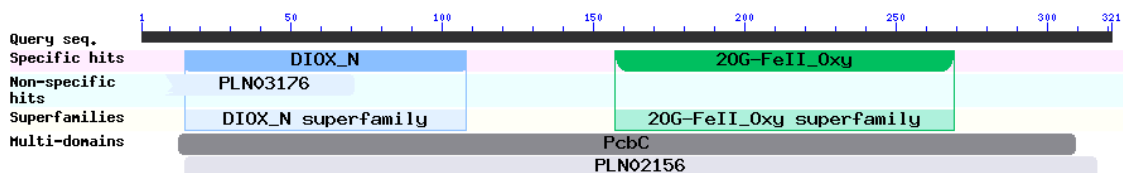**Figure S36.** Conserved domains detected in the gibberelin 2-oxidase gene from *Arabidopsis thaliana* (gi|75308865|sp|Q9C7Z1.1|G2OX4\_ARATH) (edited from the NCBI CDD database, [1]).

**Table S36.** List of domain hits for a putative abietadienol/ abietadienal oxidase gene from *L. dendroidea*.

| Name     | Accession | Description                                                                                | Interval | E-Value   |
|----------|-----------|--------------------------------------------------------------------------------------------|----------|-----------|
| PLN02936 | PLN02936  | epsilon-ring hydroxylase                                                                   | 135–620  | 5.82e-141 |
| p450     | pfam00067 | Cytochrome P450; Cytochrome P450s are haem-thiolate proteins involved in the oxidative ... | 139–613  | 6.45e-78  |
| CypX     | COG2124   | Cytochrome P450 [Secondary metabolites biosynthesis, transport, and catabolism]            | 154–620  | 2.27e-42  |
| PLN02290 | PLN02290  | cytokinin trans-hydroxylase                                                                | 207–618  | 1.36e-32  |
| PLN03195 | PLN03195  | fatty acid omega-hydroxylase; Provisional                                                  | 179–620  | 3.59e-31  |
| PLN02302 | PLN02302  | ent-kaurenoic acid oxidase                                                                 | 381–579  | 1.91e-27  |
| PLN02183 | PLN02183  | ferulate 5-hydroxylase                                                                     | 394–594  | 1.27e-24  |
| PLN00110 | PLN00110  | flavonoid 3',5'-hydroxylase (F3'5'H); Provisional                                          | 382–594  | 1.17e-23  |
| PLN02655 | PLN02655  | ent-kaurene oxidase                                                                        | 370–623  | 1.76e-23  |
| PLN02426 | PLN02426  | cytochrome P450, family 94, subfamily C protein                                            | 387–620  | 1.04e-22  |
| PLN02687 | PLN02687  | flavonoid 3'-monooxygenase                                                                 | 326–621  | 1.89e-22  |
| PLN02394 | PLN02394  | trans-cinnamate 4-monooxygenase                                                            | 399–589  | 3.07e-22  |
| PTZ00404 | PTZ00404  | cytochrome P450; Provisional                                                               | 139–597  | 1.17e-21  |
| PLN03112 | PLN03112  | cytochrome P450 family protein; Provisional                                                | 359–624  | 1.27e-21  |
| PLN03234 | PLN03234  | cytochrome P450 83B1; Provisional                                                          | 129–615  | 3.95e-21  |
| PLN02169 | PLN02169  | fatty acid (omega-1)-hydroxylase/midchain alkane hydroxylase                               | 179–621  | 1.62e-19  |
| PLN02966 | PLN02966  | cytochrome P450 83A1                                                                       | 372–624  | 2.70e-18  |
| PLN02987 | PLN02987  | Cytochrome P450, family 90, subfamily A                                                    | 382–598  | 3.61e-18  |
| PLN02500 | PLN02500  | cytochrome P450 90B1                                                                       | 380–597  | 2.47e-17  |
| PLN02196 | PLN02196  | abscisic acid 8'-hydroxylase                                                               | 358–620  | 1.48e-16  |
| PLN00168 | PLN00168  | Cytochrome P450; Provisional                                                               | 145–591  | 5.93e-16  |
| PLN02774 | PLN02774  | brassinosteroid-6-oxidase                                                                  | 380–588  | 1.93e-12  |
| PLN03018 | PLN03018  | homomethionine N-hydroxylase                                                               | 386–588  | 4.15e-11  |
| PLN03141 | PLN03141  | 3-epi-6-deoxocathasterone 23-monooxygenase; Provisional                                    | 386–622  | 1.97e-10  |
| PLN02971 | PLN02971  | tryptophan N-hydroxylase                                                                   | 386–624  | 1.99e-10  |
| PLN02738 | PLN02738  | carotene beta-ring hydroxylase                                                             | 135–633  | 2.48e-167 |

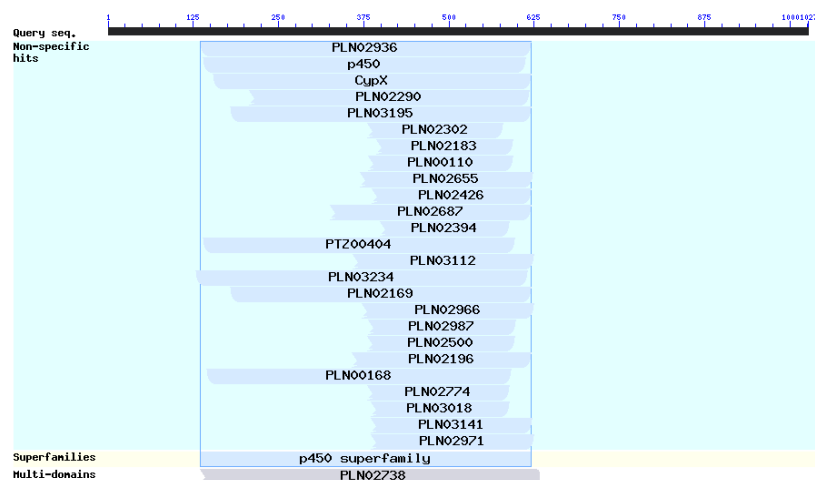**Figure S37.** Conserved domains detected in a putative abietadienol/abietadienal oxidase gene from *L. dendroidea* (edited from the NCBI CDD database, [1]).

**Table S37.** List of domain hits for the abietadienol/abietadienal oxidase gene from *Pinus taeda* (sp|Q50EK6] C72B1\_PINTA).

| Name     | Accession | Description                                                                                | Interval | E-Value   |
|----------|-----------|--------------------------------------------------------------------------------------------|----------|-----------|
| PLN03141 | PLN03141  | 3-epi-6-deoxocathasterone 23-monooxygenase; Provisional                                    | 45–481   | 4.09e-132 |
| PLN02987 | PLN02987  | Cytochrome P450, family 90, subfamily A                                                    | 5–481    | 1.47e-130 |
| PLN02500 | PLN02500  | cytochrome P450 90B1                                                                       | 1–477    | 9.23e-117 |
| PLN02774 | PLN02774  | brassinosteroid-6-oxidase                                                                  | 5–477    | 5.51e-104 |
| PLN02302 | PLN02302  | ent-kaurenoic acid oxidase                                                                 | 5–477    | 6.93e-82  |
| PLN02196 | PLN02196  | abscisic acid 8'-hydroxylase                                                               | 3–477    | 9.81e-71  |
| p450     | pfam00067 | Cytochrome P450; Cytochrome P450s are haem-thiolate proteins involved in the oxidative ... | 46–454   | 7.80e-49  |
| CypX     | COG2124   | Cytochrome P450 [Secondary metabolites biosynthesis, transport, and catabolism]            | 60–477   | 3.30e-46  |
| PTZ00404 | PTZ00404  | cytochrome P450; Provisional                                                               | 18–452   | 1.33e-17  |
| PLN02936 | PLN02936  | epsilon-ring hydroxylase                                                                   | 283–459  | 3.81e-17  |
| PLN02183 | PLN02183  | ferulate 5-hydroxylase                                                                     | 46–454   | 8.12e-17  |
| PLN02290 | PLN02290  | cytokinin trans-hydroxylase                                                                | 229–460  | 1.01e-15  |
| PLN02687 | PLN02687  | flavonoid 3'-monooxygenase                                                                 | 248–458  | 5.51e-14  |
| PLN03112 | PLN03112  | cytochrome P450 family protein; Provisional                                                | 8–447    | 8.67e-13  |
| PLN02966 | PLN02966  | cytochrome P450 83A1                                                                       | 39–436   | 1.26e-11  |
| PLN00168 | PLN00168  | Cytochrome P450; Provisional                                                               | 239–459  | 6.04e-09  |
| PLN02426 | PLN02426  | cytochrome P450, family 94, subfamily C protein                                            | 251–481  | 1.59e-08  |
| PLN03234 | PLN03234  | cytochrome P450 83B1; Provisional                                                          | 265–453  | 2.81e-08  |
| PLN03195 | PLN03195  | fatty acid omega-hydroxylase; Provisional                                                  | 3–480    | 1.77e-07  |
| PLN00110 | PLN00110  | flavonoid 3',5'-hydroxylase (F3'5'H); Provisional                                          | 254–454  | 4.65e-07  |
| PLN02655 | PLN02655  | ent-kaurene oxidase                                                                        | 330–453  | 5.28e-06  |
| PLN02971 | PLN02971  | tryptophan N-hydroxylase                                                                   | 32–459   | 6.10e-06  |
| PLN02169 | PLN02169  | fatty acid (omega-1)-hydroxylase/midchain alkane hydroxylase                               | 264–442  | 1.52e-05  |
| PLN02394 | PLN02394  | trans-cinnamate 4-monooxygenase                                                            | 279–451  | 2.37e-05  |
| PLN03018 | PLN03018  | homomethionine N-hydroxylase                                                               | 4–100    | 2.90e-04  |
| PLN02738 | PLN02738  | carotene beta-ring hydroxylase                                                             | 256–461  | 4.83e-23  |

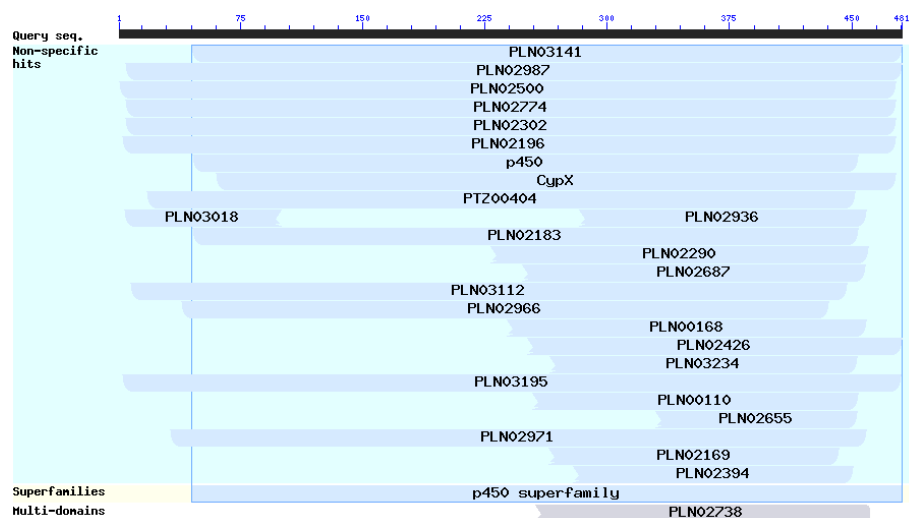**Figure S38.** Conserved domains detected in the abietadienol/abietadienal oxidase gene from *Pinus taeda* (sp|Q50EK6] C72B1\_PINTA) (edited from the NCBI CDD database, [1]).

## References

1. Conserved Domain Database (CDD). Available online: <http://www.ncbi.nlm.nih.gov/Structure/cdd/wrpsb.cgi> (accessed on 15 September 2014).
2. Edgar, R.C. MUSCLE: Multiple sequence alignment with high accuracy and high throughput. *Nucleic Acids Res.* **2004**, *32*, 1792–1797.
3. Waterhouse, A.M.; Procter, J.B.; Martin, D.M.A.; Clamp, M.; Barton, G.J. Jalview Version 2—A multiple sequence alignment editor and analysis workbench. *Bioinformatics* **2009**, *25*, 1189–1191.

© 2015 by the authors; licensee MDPI, Basel, Switzerland. This article is an open access article distributed under the terms and conditions of the Creative Commons Attribution license (<http://creativecommons.org/licenses/by/4.0/>).
